# Supplementary material
Source: publisher site journal article supplement (https://www.dovepress.com/article/464365)
Supplement: Supplementary file 1 [file get_supplementary_file.php]

**Supplementary Figure 1** PRISMA Flow Chart for Search Conducted Between January 1, 2010, and February 6, 2020 (date of last search). **Abbreviations:** cTTP, congenital thrombotic thrombocytopenic purpura; iTTP, immune-mediated thrombotic thrombocytopenic purpura; TTP, thrombotic thrombocytopenic purpura.


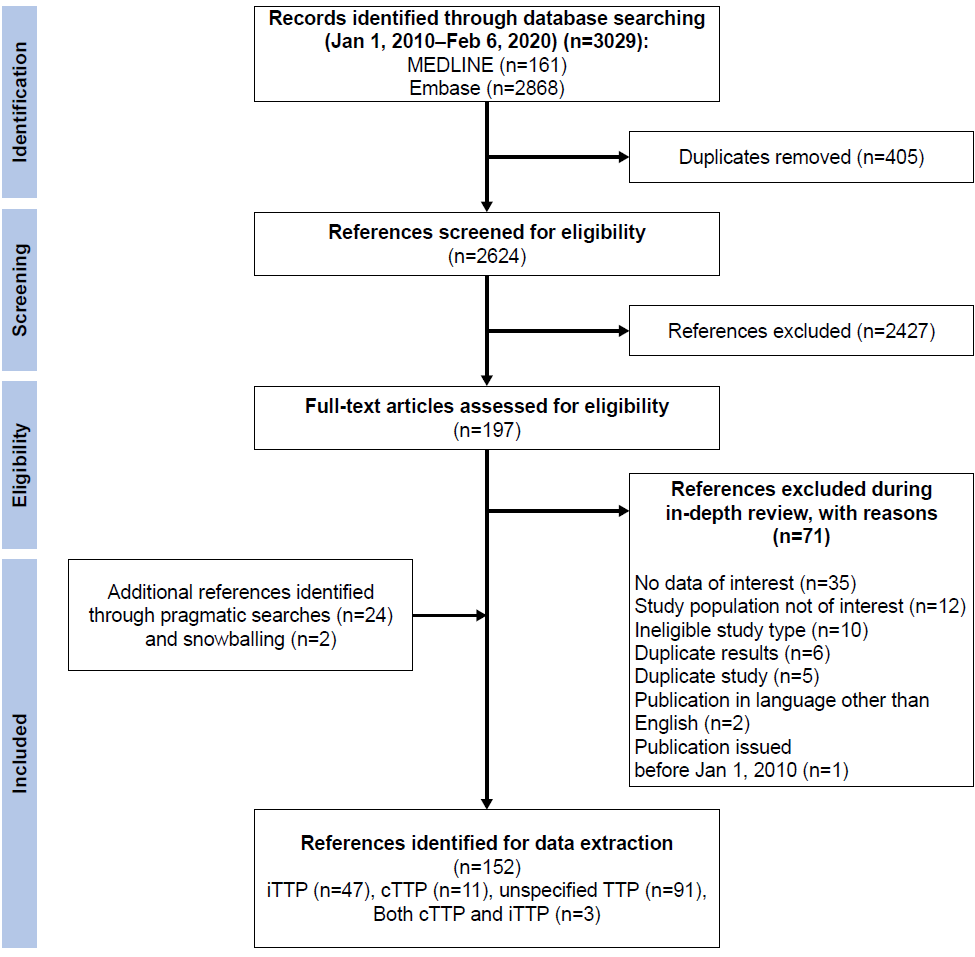


Supplementary Table 1 Literature Search Strategies

| **Time Period** | **MEDLINE** | | | **Embase** | | | |
| --- | --- | --- | --- | --- | --- | --- | --- |
| January 1, 2010 to February 6, 2020 | ***Step:*** | ***Keywords:*** | ***n***** | ***Step:*** | | ***Keywords:*** | ***n***** |
| #1 | Purpura, Thrombotic Thrombocytopenic/ | 4499 | #1 | | (thrombotic thrombocytopenic purpura or TTP).ab,ti. | 17,335 |
| #2 | Incidence/ or Prevalence/ or Mortality/ or Age Distribution/ or Gender Distribution/ or Comorbidity/ or Disease Progression/ or Natural History/ or Disease Management/ or Drug Therapy/ or Hospitalization/ or (complication* or clinical outcome* or course of disease or burden of illness or health related quality of life or QoL).ab,ti | 1,938,787 | #2 | | Incidence/ or Prevalence/ or Mortality/ or Age Distribution/ or Sex ratio/ or Comorbidity/ or Disease Management/ or Drug therapy/ or (natural history or complication* or course of disease or disease progression or burden of illness or health related quality of life or QoL).ab,ti. | 3,896,919 |
| #3 | 1 AND 2 | 530 | #3 | | 1 AND 2 | 4323 |
| #4 | Limit 3 to (abstracts and human and English language and yr.="2010 - 06 February 2020") | 161 | #4 | | limit 3 to (abstracts and human and English language and yr.="2010 - 06 February 2020") | 2868 |
| MEDLINE and Embase combined  No. of duplicates  **TOTAL** | | | | | | 3029  405  **2624** |
| January 1, 2020 and February 11, 2022 | ***Step:*** | ***Keywords:*** | ***n***** | | ***Step:*** | ***Keywords:*** | ***n***** |
| #1 | Purpura, Thrombotic Thrombocytopenic/ | 4843 | | #1 | (thrombotic thrombocytopenic purpura or TTP).ab,ti. | 19,396 |
| #2 | Incidence/ or Prevalence/ or Epidemiology/ or Mortality/ or Recurrent disease/ or Relapse/ or Age Distribution/ or Sex ratio/ or Comorbidity/ or Disease Management/ or Drug therapy/ or (incid* or preval* or recur* or relapse or natural history or complication* or course of disease or disease progression or burden of illness or health related quality of life or QoL or ADAMTS13).ab,ti. | 3,769,661 | | #2 | Incidence/ or Prevalence/ or Epidemiology/ OR Mortality/ or Recurrent disease/ OR Relapse/ OR Age Distribution/ or Sex ratio/ or Comorbidity/ or Disease Management/ or Drug therapy/ or (incid* or preval* or recur* or relapse or natural history or complication* or course of disease or disease progression or burden of illness or health related quality of life or QoL or ADAMTS13).ab,ti. | 6,641,487 |
| #3 | Exp Cardiovascular Diseases/ or exp Renal Insufficiency/ or exp Mental Health/ or (organ damage or long-term organ damage or neurologic deficiency).ab,ti. | 2,770,841 | | #3 | Exp cardiovascular disease/ or exp kidney failure/ or exp mental health/ or (organ damage or long-term organ damage or neurologic deficiency).ab,ti. | 4,853,192 |
| #4 | exp ADAMTS13 Protein/ or von Willebrand factor cleaving proteinase.ab,ti. | 2033 | | #4 | Exp von Willebrand factor cleaving proteinase/ | 5522 |
| #5 | 2 OR 3 OR 4 | 5,954,169 | | #5 | 2 OR 3 OR 4 | 9,796,608 |
| #6 | 1 AND 5 | 836 | | #6 | 1 AND 5 | 13,324 |
| #7 | limit 6 to (abstracts and humans and yr="2020 -Current") | 199 | | #7 | limit 6 to (abstracts and humans and yr="2020 -Current") | 1409 |
| MEDLINE and Embase combined  No. of duplicates  **TOTAL** | | | | | | 1608  221 **1387** |

**Notes:** *Truncation of search terms; **Number of records found in search.

**Abbreviation:** ab,ti: abstract/title.

Supplementary Table 2 Websites Searched During Pragmatic Searches

| **Sources** | **Keywords or Strategies Used** |
| --- | --- |
| Learned/clinical societies | • American Society of Hematology (ASH)  • Bari International Conference (BIC)  • European Association for Haemophilia and Allied Disorders (EAHAD)  • Hemostasis and Thrombosis Research Society (HTRS)  • International Society of Hematology (ISH)  • International Society on Thrombosis and Haemostasis (ISTH)  • Orphanet |
| Scientific conferences and annual meetings | • EAHAD Annual Congress  • HTRS Scientific Symposium  • ISH World Congress  • ISTH Annual Meeting  • Thrombosis and Hemostasis Summit of North America (THSNA) |
| Patient associations | • Answering T.T.P – Thrombotic Thrombocytopenic Purpura Foundation  • Clots Matter  • The American Thrombosis and Hemostasis Network (ATHN)  • National Blood Clot Alliance |
| Existing TTP registries | • The Hereditary Thrombotic Thrombocytopenic Purpura Registry  • United States Thrombotic Microangiopathies Consortium  • The French TMA Reference Center  • Milan TTP Registry  • The United Kingdom TTP Registry  • Spanish Registry of TTP  • St. Michael’s TTP Registry  • The Oklahoma TTP–HUS Registry  • Australian TTP/TMA Registry  • Japanese TTP Registry  • TTP Registry of the Mainz University Medical Center |

**Abbreviations:** ASH, American Society of Hematology; ATHN, The American Thrombosis and Hemostasis Network; BIC, Bari International Conference; EAHAD, European Association for Haemophilia and Allied Disorders; HTRS, Hemostasis and Thrombosis Research Society; HUS, hemolytic uremic syndrome; ISH, International Society of Hematology; ISTH, International Society on Thrombosis and Haemostasis; TMA, thrombotic microangiopathy; TTP, thrombotic thrombocytopenic purpura.

Supplemental Table 3 Key Characteristics of Publications Reporting Information on TTP (n=221 sources)

| **Reference/Study Type (Design)** | **Country/ Countries** | **Study Period** | **Targeted Age** | **No. of Patients with TTP** |
| --- | --- | --- | --- | --- |
| **Unspecified TTP (113 studies)** | | | | |
| Alcada et al, 2013 1 (retrospective study) | UK | Sep 2006–Oct 2012 | No age definition | 57 |
| Al Hashmi et al, 2018 2  Single-center (retrospective cohort) | Oman | 2006–2018 | ≥12 years | 38 |
| Ashida et al, 2018 3  (cross-sectional study) | Japan | 2012–2015 | No age definition | 258 |
| Aryal et al, 2017 4 Database (retrospective cohort) | US | 2009–2014 | ≥18 years | 32,609 |
| Balasubramaniyam et al, 2013 5 (retrospective cohort) | US | 2001–2010 | ≥18 years | 4032 |
| Balasubramaniyam et al, 2021 6 Database (retrospective cohort) | US | Jan 2005–Sep 2015 | ≥18 years | 15,054 hospitalizations |
| Berg et al, 2013 7  (retrospective cohort) | US | Jan 1990–May 2012 | No age definition | 19 |
| Bhesania et al, 2020 8  Database (retrospective cohort) | US | 2007–2017 | 33–60 years | 22,054 hospitalizations |
| Blombery et al, 2016 9  Registry (retrospective cohort) | Australia | Jun 2009–Oct 2014 | No age definition | 57 |
| Bookout et al, 2013 10 (retrospective cohort) | US | 2005–2012 | No age definition | 29 |
| Bugarin-Estrada et al, 2018 11 (retrospective cohort) | Mexico | Jan 2011–Nov 2017 | ≥16 years | 20 |
| Jan 2007–Mar 2018 | Adults | NR |
| Bull et al, 2011 12  (retrospective cohort) | UK | 2014–2019 | ≥18 years | 148 |
| Castro et al, 2020 13  (retrospective cohort) | Brazil | 1995–2016 | No age definition | 34 |
| Chang et al, 2012 14  (retrospective cohort) | China | 1997–2009 | No age definition | 13 |
| Chaturvedi et al, 2015 15 (prospective cohort) | US | Jan 2000–Mar 2012 | 16–79 years | 100 |
| Chaturvedi et al, 2019 16 (retrospective cohort) | US | 1995–2018 | No age definition | 137 |
| Chaturvedi et al, 2013 17 (retrospective cohort) | US | Jan 2000–Mar 2012 | No age definition | 100 |
| Chinthammitr et al, 2017 18 (retrospective cohort) | Thailand | 1999–2013 | No age definition | 45 |
| Chu et al, 2019 19  (retrospective cohort) | US | 1991–2014 | ≥18 years | 858 |
| Cohen et al, 2020 20  (retrospective cohort) | Israel | 2008–2018 | Adults | 89 |
| Cuicui et al, 2015 21  (retrospective study) | China | 1998 –2014 | No age definition | 58 |
| Coppo et al, 2021a 22 Orphanet website (N/A) | Worldwide | 2021 | No age definition | NR |
| Dahlan et al, 2015 23  (retrospective cohort) | Canada | 2000–2011 | No age definition | 70 |
| Davies et al, 2015 24  (retrospective cohort) | Canada | 2005–2010 | No age definition | 38 |
| Davis et al, 2017 25  Registry (retrospective cohort) | US | 2017a | No age definition | 199 |
| De Marinis et al, 2013 26  (case series) | Italy | Jun 2005–Nov 2012 | No age definition | Overall population 119 (TTP 88) |
| Deford et al 2012 27  Registry (retrospective cohort) | US | 1995–2010 | No age definition | 47 |
| Demir et al, 2010 28  (retrospective cohort) | Turkey | 2010a | Adults | 25 |
| Deng et al, 2013 29  (retrospective cohort) | China | Jan 1998–Oct 2010 | No age definition | 42 |
| El Husseiny et al, 2011 30 (retrospective cohort) | Egypt | 2000–2008 | No age definition | 30 |
| Engelbrecht et al, 2013a 31  Registry (retrospective cohort) | Australia | 2009–2012 | No age definition | 70 |
| Engelbrecht et al, 2013b 32  Registry (retrospective cohort) | Australia | 2009–2012 | 15–83 years | 86 |
| Esteban Figuerola et al, 2017 33 (retrospective cohort) | Spain | 2000–2017 | No age definition | 13 |
| Falter et al 2015 34  (cross-sectional study) | Germany | 2015a | No age definition | NR |
| Ferrari et al 2015 35 (prospective cohort) | Italy | 2007–2012 | No age definition | 13 |
| Fourmont et al, 2018 36 (retrospective cohort) | France | 2007–2017 | No age definition | 98 |
| Gandhi et al, 2010 37  Single center (retrospective cohort) | US | 2010a | No age definition | 38 |
| Gao et al, 2016 38  Single-center (retrospective cohort) | US | 2005–2015 | Adults | 16 |
| Giri et al, 2014 39  Database (retrospective cohort) | US | 2009–2011 | No age definition | 6634 |
| Goel et al, 2016 40  Database (retrospective cohort) | US | 2007–2012 | No age definition | 8203 |
| Henry et al, 2021 41  (retrospective cohort) | France | 2008–2018 | >18 years | 12 |
| Heizmann et al, 2011 42  Single-center (retrospective cohort) | Switzerland | 2006–2010 | Adults | 7 |
| Herold et al, 2017 43  (retrospective cohort) | Germany | 2017a | No age definition | 88 |
| Hofmann et al, 2016 44  Medical chart review (retrospective cohort) | US | May 2014–Sep 2015 | No age definition | 66 |
| Houstoun et al, 2013 45  Database (retrospective cohort) | US | 2006–2011 | >65 years | 694,419 |
| Hussein et al, 2017 46  (prospective cohort) | Egypt | Jan 2008–Jan 2016 | No age definition | 33 |
| Hussein et al, 2020 47  single-center (prospective cohort) | Egypt | 2008–2019 | 14–55 years | 44 |
| Iqbal et al, 2015 48  Single-center (retrospective cohort) | Saudi Arabia | 2006–2014 | No age definition | 10 |
| Iqbal et al, 2016 49  Single-center (retrospective cohort) | Saudi Arabia | Oct 2006–Apr2015 | >16 years | 24 |
| Isbel et al, 2012 50  Registry (retrospective cohort) | Australia | 2012a | No age definition | 60 |
| Jang et al, 2011 51  Registry (retrospective cohort) | Korea | 2005–2008 | No age definition | 66 |
| John et al, 2012 52  (cross-sectional) | Germany | 2012a | Adults | 76 |
| Khwaja et al, 2017 53  Single-center (retrospective cohort) | UK | 2009–2015 | No age definition | 107 |
| Knott et al, 2020 54  (retrospective cohort) | UK | 2017–2019 | No age definition | 38 |
| Korkmaz et al, 2013 55  Multicenter (retrospective cohort) | Turkey | 2005–2011 | No age definition | 163 |
| Lannon et al, 2016 56 Multicenter (retrospective cohort) | UK | Feb 2011–Sep 2014 | No age definition | 81 |
| Lester et al, 2015 57 Database (retrospective cohort) | UK | 2003–2013 | No age definition | NR |
| Li et al, 2015 58  Registry (case-control study) | US | 2015a | No age definition | 71 |
| Liu et al, 2013 59  Single-center (retrospective cohort) | US | Dec 2003–Dec 2010 | No age definition | 64 |
| Liu et al, 2017 60  Database (retrospective cohort) | US | 2005–2014 | No age definition | 2713 |
| Lotta et al, 2010 61  Registry (retrospective cohort) | Italy | 1999–2009 | No age definition | 136 |
| Makroo et al, 2014 62  (retrospective cohort) | India | Jul 2008–Jun 2013 | No age definition | 51 |
| Mancio et al, 2015 63  Single-center (retrospective cohort) | Philippines | Jan 2009–Mar 2013 | No age definition | 8 |
| Mariotte et al, 2013 64  Single-center (retrospective cohort) | France | Jan 1997–Jan 2011 | Adults | 86 |
| Mariotte et al, 2016 65 Registry (cross-sectional) | France | 1999–2013 | Adults | 772 |
| Mariotte et al, 2017 66  Single-center (retrospective cohort) | France | 2006–2015 | No age definition | 81 |
| McCleskey et al, 2013 67  Single center (retrospective cohort) | US | 2003–2012 | No age definition | 52 |
| Merlen et al, 2021 68 Single-center (retrospective cohort) | Canada | Apr 2012–Dec 2019 | No age definition | NR |
| Mirouse et al, 2020 69  Single-center (prospective cohort) | France | 1997–2019 | Adults | 108 |
| Mirouse et al, 2021 70  Single-center (prospective cohort) | France | 1997–2019 | 30–52 years | 108 |
| Nichols et al, 2015 71  (retrospective cohort) | US | Jan 1990–Apr 2012 | No age definition | 18 |
| O'Brien et al, 2013 72  (retrospective cohort) | US | 2004–2011 | No age definition | 21 |
| Obeidat et al, 2020 73  Single-center (retrospective cohort) | Jordan | Jun 2018–Jul 2019 | Adults and elderly | 21 |
| Oh et al, 2015 74  (retrospective cohort) | Korea | Jan 2005–Jun 2014 | No age definition | 169 |
| Oh et al, 2019 75  Registry (retrospective cohort) | Korea | Feb 2012–Dec 2015 | No age definition | 98 |
| Ongoren Aydin et al, 2014 76  (retrospective cohort) | Turkey | Oct 1991–Jan 2014 | No age definition | 54 |
| Pathak et al, 2014 77  Database (retrospective cohort) | US | 2009–2011 | ≥18 years | 4367 |
| Pishko et al, 2014 78  Single-center (retrospective cohort) | US | Jan 2007–Jun 2013 | No age definition | 44 |
| Ramachandran et al, 2021 79 (retrospective cohort) | US | 2014–2020 | 22–79 | 11 |
| Raval et al, 2021 80  Registry (retrospective cohort) | US | 2021a | No age definition | 43 |
| Reese et al, 2012 81  Registry (retrospective cohort) | US | 1995–2010 | No age definition | 55 |
| Reese et al, 2013 82 Registry (retrospective cohort) | US | 1996–2012 | No age definition | 333 |
| 1996–2012 | <18 years | 55 |
| 2002–2011 | <18 years | 23 |
| Roriz et al, 2015 83  Registry (retrospective cohort) | France | Oct 2000–May 2009 | No age definition | 261 |
| Sanci et al, 2015 84  Single-center (retrospective cohort) | Canada | Jan 2002–Apr 2015 | No age definition | 19 |
| Saracevic et al, 2013 85  Registry (ambispective cohort) | Serbia | Aug 2004–Dec 2012 | No age definition | 51 |
| Sawler et al, 2019 86  Multicenter (retrospective cohort) | Canada | 2008–2017 | ≥18 years | 51 |
| Scott et al, 2013 87 Single-center (retrospective cohort) | US | Jan 2003–Sep 2012 | No age definition | 54 |
| Scully et al, 2008 88  Registry (retrospective cohort) | UK | Apr 2002–Dec 2006 | No age definition | 178 |
| Selvakumar et al, 2021 89  Survey (cross-sectional study) | US | 2021a | 38–58 years | 26 |
| Shah et al, 2011 90  Single-center (retrospective cohort) | US | Jan 2006–Oct 2010 | No age definition | 26 |
| Shah et al, 2013 91  Single-center (retrospective cohort) | US | 2006–2012 | No age definition | 30 |
| Sharma et al, 2019 92  Database (retrospective cohort) | US | 2009–2016 | No age definition | 14,000 |
| Shin et al, 2019 93  Registry (retrospective cohort) | UK | 2009–2018 | No age definition | 475 |
| Sousa et al, 2020 94 Database (retrospective cohort) | Portugal | 2014–2018 | No age definition | 71 |
| Subramanian et al, 2013 95  Database (retrospective cohort) | US | 2001–2010 | ≥18 years | 4032 |
| Swart et al, 2019 96  Single-center (retrospective cohort) | South Africa | 2012–2016 | ≥18 years | 41 |
| Taha et al, 2013 97  Single-center (retrospective cohort) | Qatar | 2008–2012 | No age definition | 8 |
| Terrell et al, 2019 98  (cross-sectional study) | US | May 2018–Oct 2018 | >18 years | 25 |
| Thomas et al, 2016 99  Single-center (retrospective cohort) | UK | 2010–2015 | No age definition | 14 |
| Tse et al, 2019 100  Single-center (retrospective cohort) | Canada | 2008–2018 | No age definition | 77 |
| Ugur Bilgin et al, 2012 101  Single-center (retrospective cohort) | Turkey | 2000–2011 | No age definition | 18 |
| Umapathi et al, 2020 102 Database (retrospective cohort) | US | 2003–2014 | No age definition | 1568 hospitalizations |
| Van de Louw et al, 2021 103 Database (retrospective cohort) | US | 2005–2014 | >18 to <65 years | 1096 |
| Vesely et al, 2015 104  Registry (retrospective cohort) | US | 1995–2006 | No age definition | 57 |
| Volker et al, 2020 105  (retrospective cohort) | Germany | Jun 2018 - Dec 2019 | No age definition | 60 |
| Wahl et al, 2012 106 Database (retrospective cohort) | US | Jan 2001–May 2008 | No age definition | 151 |
| Wong et al, 2015 107  Multicenter (retrospective cohort) | UK | Jan 2012–Oct 2013 | No age definition | 19 |
| Wu et al, 2013 108  Single-center (retrospective cohort) | US | 2004–2012 | No age definition | 14 |
| Xiyan et al, 2020 109  (retrospective cohort) | China | 1998–2019 | 10–68 years | 83 |
| Zafrani et al, 2015 110  Single-center (retrospective cohort) | France | Jan 2001–Mar 2013 | Adults | 92 |
| Zhan et al, 2010 111  Single-center (retrospective cohort) | US | Jan 1992–Apr 2008 | No age definition | 72 |
| Zhang et al, 2016 112  Multicenter (retrospective cohort) | China | Aug 2009–Sep 2015 | No age definition | 65 |
| Zhang et al, 2022 113 Single-center (retrospective cohort) | China | Feb 2009–Dec 2018 | No age definition | 45 |
| **iTTP (88 studies)** | | | | |
| Abou-Ismail et al, 2019 114 Single-center (retrospective cohort) | US | 2009–2019 | No age definition | 42 |
| Abou-Ismail et al, 2020 115 Single-center (retrospective cohort) | US | 2010–2019 | No age definition | 38 |
| Adeyemi et al, 2021 116 Database (retrospective cohort) | US | Oct 2015–Dec 2019 | No age definition | 666 |
| Agosti et al, 2020 117 Registry (retrospective cohort) | Italy | Jan 2002–Mar 2018 | No age definition | 143 |
| Alwan et al, 2017a 118 Registry (prospective cohort) | UK | 2009–2016 | 11–88 years | 292 |
| Artoni et al, 2017 119 Registry (retrospective cohort) | Italy | 2011–2015 | No age definition | 92 |
| Béranger et al, 2019 120 Registry (retrospective cohort) | France | 2006–2010 | No age definition | 114 |
| Bertomoro et al, 2020 121 Single-center (retrospective cohort) | Italy | 2014–2019 | No age definition | 39 |
| Bettoni et al, 2012 122 Multicenter (retrospective cohort) | Europe | 1994–2010 | No age definition | 115 |
| Bichard et al, 2021 123 Registry (retrospective cohort) | Italy | May 2003–Oct 2020 | No age definition | 43 |
| Boothby et al, 2021 124 Registry (retrospective cohort) | US | 1985–2019 | No age definition | 1068 |
| Brodsky et al, 2021 125 Registry (retrospective cohort) | US | 1995–2020 | No age definition | 181 |
| Cataland et al, 2013 126 Single-center (retrospective cohort) | US | May 2002–August 2010 | No age definition | 32 |
| Chauvel et al, 2020 127 Single-center (retrospective cohort) | France | Jan 2009–Oct 2018 | >18 years | 9 |
| Colling et al, 2020 128 Multicenter (retrospective cohort) | US | Jan 2004–Apr 2017 | ≥18 years | 124 |
| Coppo et al, 2021b 129 Registry (retrospective cohort) | France | 2021 | No age definition | 90 |
| Del Rio-Garma et al, 2019 130 Registry (retrospective cohort) | Spain | 2004–2018 | No age definition | 103 |
| Del Río-Garma et al, 2022 131 Registry (retrospective cohort) | Spain | 2004–2018 | >16 years | 102 |
| Domingo-González et al, 2021 132 Single-center (retrospective cohort) | Spain | 2008–2020 | Adults | 20 |
| Dutt et al, 2021 133  Registry (retrospective cohort) | UK | May 2018–Jan 2020 | No age definition | 85 |
| El-Ashwah et al, 2021 134 Single-center (retrospective cohort) | Egypt | 2016–2019 | No age definition | 21 |
| Faisal et al, 2021 135 Registry (retrospective cohort) | US | 2021a | No age definition | 136 |
| Falter et al, 2018 136 Single-center (retrospective cohort) | Germany | Jan 2003–Nov 2014 | No age definition | 70 |
| Fianchi et al, 2016 137 Single-center (retrospective cohort) | Italy | 2005–2015 | No age definition | 48 |
| Garcia-Garcia et al, 2020 138 Registry (retrospective cohort) | Spain | 2018–2020 | No age definition | 30 |
| Goguillot et al, 2018 139 Database (retrospective cohort) | France | 2012–2014 | No age definition | 348 |
| Graciaa et al, 2020 140 Single-center (retrospective cohort) | US | 2001–2019 | ≤19 years | 15 |
| Güzel Mastanzade et al, 2019 141 Single-center (retrospective cohort) | Turkey | Feb 2006–Jul 2019 | No age definition | 130 |
| Han et al, 2015 142 Registry (retrospective cohort) | US | 1995–2013 | No age definition | 52 |
| Hie et al, 2013 143 Registry (retrospective cohort) | France | 2013a | No age definition | 48 |
| Hofmann et al, 2019 144 Single-center (retrospective cohort) | US | Jul 2013–Dec 2018 | No age definition | 182 |
| Holmes et al, 2021 145 Online survey (cross-sectional) | UK | Jul 2019–Nov 2019 | ≥18 years | 50 |
| Hong et al, 2019 146 Multicenter (retrospective cohort) | Korea | 2019a | No age definition | 20 |
| Hrachovinova et al, 2019 147 Single-center (retrospective cohort) | Czechia | 1993–2019 | No age definition | 35 |
| Hsu et al, 2011 148 Single-center (retrospective cohort) | US | 2004–2010 | No age definition | 40 |
| Huang et al, 2021 149 Single-center (retrospective cohort) | China | 2013–2017 | Adults | 55 |
| Jestin et al, 2018 150 Registry (ambispective cohort) | France | Jan 2012–Feb 2017 | No age definition | 115 |
| Jimenez et al, 2020 151 Single-center (retrospective cohort) | Spain | 2014–2020 | No age definition | 18 |
| Joly et al, 2016 152 Registry (retrospective cohort) | France | 2000–2015 | No age definition | 45 |
| Kayashima et al, 2021 153 Registry (retrospective cohort) | Japan | 2006–2020 | No age definition | 240 |
| Kubo et al, 2020 154 Registry (retrospective cohort) | Japan | 2006–2018 | ≥12 years | 156 |
| Li et al, 2021 155 Single-center (retrospective cohort) | China | Jul 2014–Feb 2020 | No age definition | 19 |
| Little et al, 2017 156 Registry (retrospective cohort) | US | Nov 1995–Dec 2015 | No age definition | 78 |
| Liu et al, 2019 157 Registry (retrospective cohort) | US | 2019a | No age definition | 734 |
| Logothetis et al, 2021 158 Single-center (retrospective cohort) | US | Jan 2019–Feb 2021 | No age definition | 10 |
| Mancini et al, 2019 159 Registry (retrospective cohort) | Italy | Jan 2002–Nov 2015 | No age definition | 302 |
| Mancini et al, 2020 160 Registry (case-control/cohort study) | Italy | Jan 2002–Mar 2018 | No age definition | Case-control study: n=161  Cohort study: n=153 |
| Marshall et al, 2019 161 Registry (retrospective cohort) | US | 2019a | No age definition | 775 |
| Masias et al, 2020 162 Registry (retrospective cohort) | US | 2003–2014 | No age definition | 41 |
| Matsumoto et al, 2012 163 Registry (retrospective cohort) | Japan | 1998–2008 | No age definition | 186 |
| Miesbach et al, 2019 164 Multicenter (modeling) | Germany | 2013–2017 | No age definition | NR |
| Morgand et al, 2014 165 Registry (retrospective cohort) | France | Oct 2000–Jun 2009 | No age definition | 280 |
| Owattanapanich et al, 2019 166 Meta-analysis (NA) | NA | 2018 | No age definition | 570 |
| Page et al, 2017 167 Registry (retrospective cohort) | US | Nov 1995–Dec 2015 | No age definition | 78 |
| Pascual-Izquierdo et al, 2019 168 Multicenter (retrospective cohort) | Spain | 2015–2017 | >16 years | 203 |
| Pascual-Izquierdo et al, 2021 169 Multicenter (cross-sectional) | Spain | 2015–2017 | ≥16 years | 329 |
| Pham et al, 2016 170 Single-center (retrospective cohort) | US | 2006–2015 | No age definition | 52 |
| Pollissard et al, 2021 171 Database (retrospective cohort) | US | 2010–2018 | ≥18 years | 2279 |
| Ramachandran et al, 2020 172 Single-center (retrospective cohort) | US | 2010–2018 | 22–79 years | 2276 |
| Raval et al, 2020 173 Registry (retrospective cohort) | US | 2020a | 36–68 | 50 |
| Renaud et al, 2021 174 Single-center (retrospective cohort) | France | 2005–2020 | No age definition | 38 |
| Riva et al, 2020 175 Single-center (cross-sectional) | Italy | Dec 2015–Oct 2016 | No age definition | 35 |
| Salaj et al, 2017 176 Single-center (retrospective cohort) | Czechia | 1993–2016 | No age definition | 34 |
| Schieppati et al, 2018 177 Multicenter (prospective cohort) | Italy | 2002–2018 | No age definition | 74 |
| Schieppati et al, 2020 178 Multicenter (prospective cohort) | Italy | 2002–2018 | No age definition | 74 |
| Schneidewend et al, 2018 179 Registry | Japan | 2018a | No age definition | NR |
| Sinkovits et al, 2018 180 Registry (retrospective cohort) | Hungary | Aug 2007–Mar 2017 | No age definition | 81 |
| Sridharan et al, 2017 181 Registry (retrospective cohort) | US | 2017 (year of publication) | No age definition | 138 |
| Staley et al, 2019 182 Registry (retrospective cohort) | US | Apr 2006–Dec 2017 | No age definition | 73 |
| Sukumar et al, 2022 183 Registry (retrospective cohort) | US | 2003–2020 | No age definition | 222 |
| Sun et al, 2019 184 Multicenter (retrospective cohort) | US | Jan 2004–Mar 2017 | ≥18 years | 124 |
| Sun et al, 2021 185 Single-center (retrospective cohort) | China | 2012–2017 | No age definition | 55 |
| Tekgündüz et al, 2018 186 Multicenter (retrospective cohort) | Turkey | 2011–2015 | No age definition | 67 |
| Terrell et al, 2021 187 Database (cross-sectional) | US | Aug 2018 - Oct 2021 | >18 years | 94 |
| Tiscia et al, 2020 188 Multicenter (retrospective cohort) | Italy | Jan 2012–Sep 2019 | No age definition | 54 |
| Tiscia et al, 2021 189 Multicenter (prospective cohort) | Italy | Aug 2013–May 2021 | No age definition | 89 |
| Toussaint-Hacquard et al, 2015 190 Registry (retrospective cohort) | France | Jan 2005–Jun 2010 | ≥18 years | 108 |
| Upreti et al, 2019 191 Registry (ambispective) | US | 1995–2018 | No age definition | 170 |
| Vataire et al, 2022a 192 Registry (retrospective cohort) | France | 2015–2019 | No age definition | 306 |
| Vataire et al, 2022b 193 (retrospective cohort) | France | 2015–2019 | No age definition | 267 |
| von Auer et al, 2019 194 Registry (prospective cohort) | Germany | 2016–2018 | No age definition | 78 |
| Von Auer-Wegener et al, 2017 195 Registry (prospective cohort) | Germany | Jul 2016–May 2017 | No age definition | 54 |
| von Auer-Wegener et al, 2020 196 Registry (prospective cohort) | Germany | Jul 2016–Dec 2019 | No age definition | 103 |
| Vuclić et al, 2013 197 Multicenter (retrospective cohort) | Serbia | Aug 2004–Feb 2010 | No age definition | 28  (iTTP, n=22; HUS, n=6)b |
| Wai et al, 2017 198 Multicenter (retrospective cohort) | Singapore | Jan 2008–Jan 2017 | No age definition | 41 |
| Wu et al, 2015 199 Multicenter (retrospective cohort) | US | 2007–2010 | No age definition | 19 |
| Yamada et al, 2019 200 Database (retrospective cohort) | Japan | Jul 2010–Mar 2017 | ≥18 years | 1638 |
| Zhou et al, 2016 201 Single-center (retrospective cohort) | China | Mar 2005–Aug 2015 | No age definition | 60 |
| **cTTP (15 studies)** | | | | |
| Alwan et al, 2017b 202 Registry (retrospective cohort) | UK | 2017a | No age definition | 69 |
| Alwan et al, 2019 203  Registry (retrospective cohort) | UK | 2003–2018 | No age definition | 73 |
| Borogovac et al, 2022 204 Literature review (NA) | NA | 2001–2020 | No age definition | 226 |
| Hassenpflug et al, 2014 205 Multicenter (retrospective cohort) | Australia, Croatia, Denmark, Germany, Poland, Spain, Sweden, Turkey | 2014a | No age definition | 30 |
| Joly et al, 2018 206 Registry (cross-sectional) | France | Jan 2000–Jun 2017 | No age definition | 8421 |
| Kremer Hoivinga et al, 2017 207 Registry (ambispective cohort) | Germany | 2012–2016 | No age definition | 194  (Confirmed patients, n=108; suspected patients, n=32) |
| Mansouri et al, 2015 208 Registry (ambispective cohort) | Austria, Czechia, Germany, Japan, Norway, Switzerland, US | 2015a | No age definition | 83 |
| Oladapo et al, 2019 209 Patient interviews (prospective cohort) | US | 2016 | ≥18 years | 11 |
| Rurali et al, 2015 210 Registry (retrospective cohort) | Italy | 1996–2013 | No age definition | 18 |
| Sakai et al, 2021 211 Registry (retrospective cohort) | Japan | Apr 2020–Sep 2020 | No age definition | 55 |
| Tarasco et al, 2021a 212 Registry (prospective cohort) | Austria, Czech Republic, Germany, Japan, Norway, Switzerland, US | Aug 2018–Dec 2019 | No age definition | 87 |
| Tarasco et al, 2021b 213 Registry (prospective cohort) | Austria, Czech Republic, Germany, Japan, Norway, Switzerland, US | 2021a | ≤18 years | 47 |
| Van Dorland et al, 2019 214  Registry (ambispective cohort) | Austria, Czech Republic, Germany, Japan, Norway, Switzerland, US | 2006–2017 | No age definition | 123 |
| von Krogh et al, 2012 215  (cross-sectional) | Norway | 1998–2007 | No age definition | 11 |
| von Krogh et al, 2016 216 Multicenter (retrospective cohort) | Norway (and Central Norway region) | 1998–2007 | No age definition | 12 |
| **iTTP and cTTP (5 studies)** | | | | |
| Alwan et al, 2020 217 Registry (retrospective cohort) | UK | 2005–2019 | 13–93 years | 131 |
| Fujimura et al, 2010 218 Registry (cross-sectional) | Japan | 1998–2008 | No age definition | 325 (cTTP, n=41; iTTP, n=284) |
| Joly et al, 2017 219 Registry (retrospective cohort) | France | Jan 1999–Mar 2017 | < 18 years | 88  (cTTP, n=35; iTTP, n=45) |
| Keren-Politansky et al, 2017 220 Single-center (retrospective cohort) | Israel | 2005–2013 | No age definition | 136  (cTTP, n=19; iTTP, n=117) |
| Satija et al, 2021 221 Database (retrospective cohort) | US | 2009–2019 | No age definition | cTTP: 39  iTTP: 805 |

**Notes:**aYear of publication; bResults reported for patients with iTTP (n=22).

**Abbreviations:** cTTP: congenital thrombotic thrombocytopenic purpura; HUS: Hemolytic uremic syndrome; iTTP: immune thrombotic thrombocytopenic purpura; N/A: not applicable; NR: not reported; TTP: thrombotic thrombocytopenic purpura.

Supplementary Table 4 Key Characteristics of Studies Reporting on Prevalence / Incidence of iTTP and cTTP

| **Region** | **Country** | **Study Design (Study Period) and Data Source** | **Criteria Used for TTP** **Definition** | **Reference Population** |
| --- | --- | --- | --- | --- |
| **Unspecified TTP** | | | | |
| Europe | France | Cross-sectional (1999–2013)  Registry of the French reference center for thrombotic microangiopathies 65 | ≥1 TMA episode, ADAMTS13 level <10% | Size of reference population not reported |
| UK | Retrospective cohort (2011–2014)  Multicenter medical chart review study 56 | ADAMTS13 testing | Population of North East England (2.9 million) |
| Retrospective cohort (2003–2013)  HES database 57 | ICD-10 code M31.1 | Size of reference population not reported |
| North America | US | Retrospective cohort (2001–2007)  HealthCore Integrated Research Database™ 106 | ICD-9 code 446.6 | Size of reference population not reported |
| Retrospective cohort (2005–2014)  IBM MarketScan® Research Databases 103 | Diagnosis code of TMA and PEX procedure code | 245 million insured individuals |
| Retrospective cohort (1996–2012)  Oklahoma TTP-HUS Registry 82 | Not reported | Size of reference population not reported (US census population data was used [year 2000 for patients diagnosed in 1994–2004 and 2010 for patients diagnosed in 2005–2012]) |
| Canada | Retrospective cohort (2012–2019; reference population from 2019)  Single-center review of electronic medical/health records 68 | ADAMTS13 activity level <10% (severe deficiency) and anti-ADAMTS13 inhibitor levels | 8.485 million individuals |
| **cTTP** | | | | |
| Global | NA | Online resource (Assessment period not specified) 22 | Not reported | Size of reference population not reported |
| Europe | France | Retrospective cohort (2000–2017)  Registry of the French reference center for thrombotic microangiopathies 206 | <10–20% ADAMTS13 levels, absence of functional ADAMTS13 inhibitor and timing of TMA episode ≥age 18 for adult onset cTTP | Reference population of 8,421 |
| Norway  (and  Central Norway region) | Retrospective cohort (1998–2007)  Multicenter review of medical records 216 | Confirmed or suspected cTTPb | Population in Norway at January 2015 (5.17 x 106)  Population in Central Norway on 1 January 2008 (659,621) |
| Middle East | Israel | Retrospective cohort (2005–2013)  Single-center medical chart review 220 | ADAMTS13 activity <10% without the presence of antibodies | Israeli population as reference (size not specified) |
| **iTTP** | | | | |
| Global | NA | Online resource (Assessment period not specified) 22 | Not reported | Size of reference population not reported |
| Europe | France | Retrospective cohort (2000–2015)  Registry of the French reference center for thrombotic microangiopathies 152 | ADAMTS13 level <10%, presence of ADAMTS13 inhibitors/antibodies or activity at remission | Size of reference population not reported |
|  | Online resource 22 | Not reported | Size of reference population not reported |
| Spain | Cross-sectional (2015–2017)  Multicenter questionnaire 168 | Not reported | 18,286,291 individuals |
|  | Cross-sectional (2018)  Multicenter survey/questionnaire 169 | Presence of microangiopathies hemolytic anemia plus moderate/severe thrombocytopenia-associated organ dysfunction in absence of other causes, ADAMTS13 activity level <10%, presence of ADAMTS13 inhibitory activity | 17,205,515 (for incidence) or 15,360,484 (point prevalence) |
| Germany | Systematic review and multicenter review (2014–2014) Hospital-level data 164 | ≥1 episode/relapse, ICD-10 code M31.1 (TMA) and D59.3 (HUS)a | German reference population (2016, 82.5 million; 2015; 82.2 million; 2014, 81.2 million) |
| Norway  (and  Central Norway region) | Retrospective cohort (1998–2007)  Multicenter review of medical records 216 | Confirmed or suspected iTTPb | Population in Norway at January 2015 (5.17 x 106)  Population in Central Norway on 1 January 2008 (659,621 persons) |
| North America | US | Retrospective cohort (1995–2015)  Oklahoma TTP-HUS Registry 167 | Patients with an initial episode of iTTP | Size of reference population not reported |
| Retrospective cohort (2015–2019)  Optum-Humedica database 116 | ICD-9/ICD-10 codes | Size of reference population not reported |
| Middle East | Israel | Retrospective cohort (2005–2013)  Single-center medical chart review 220 | Presence of anti-ADAMTS13 antibodies and low activity during an acute episode | Israeli population as reference (size not specified) |
| Asia | Japan | Registry analysis (2018) Nara Medical University Registry 179 | Not reported | Size of the reference population not reported |

**Notes:** aIn Germany, both iTTP and HUS are grouped in the same diagnosis related group. iTTP could be coded as TMA or HUS; bAssessment based on ≥1 TTP-like episode with thrombocytopenia and microangiopathic hemolytic anemia, ADAMTS13 activity of <10%, homozygous or compound heterozygous ADAMTS13 mutation(s), or plasma infusion trial with full-recovery and a plasma half-life of infused ADAMTS13 of 2–4 days, patient history was associated with homozygous or compound heterozygous ADAMTS13 mutation(s) previously reported in hereditary TTP cases, ICD-9 code 446.6, ICD-10 code M31.1.

**Abbreviations:** ADAMTS13, A Disintegrin And Metalloproteinase with Thrombospondin type-1 and motifs-13; cTTP, congenital thrombotic thrombocytopenic purpura; HES, Hospital episode statistics; HUS, Hemolytic uremic syndrome; ICD-9, International Classification of Diseases: 9th revision; ICD-10, International Classification of Diseases, 10th revision; iTTP, immune-mediated thrombotic thrombocytopenic purpura; NA, not applicable; PEX, plasma exchange; TMA, thrombotic microangiopathy; TTP, thrombotic thrombocytopenic purpura; TTP-HUS, thrombotic thrombocytopenic purpura-hemolytic uremic syndrome; UK, United Kingdom; US, United States.

Supplementary Table 5 Incidence of Acute Episodes

| Type of TTP | Incidence estimates |
| --- | --- |
| Unspecified TTP | **National Inpatient Sample database**: 14.9 per 100,000 adult hospitalizations per year (2009–2014) 4 |
| iTTP | **Oklahoma TTP-HUS Registry-based study**   - Annual incidence of episodes: 3.10 per million persons per year (1995–2015) 167   **Optum-Humedica database-based study:**   - Mean annual incidence of ≥1 episode was 1.81 per million persons (2016–2019) 116   **Multicenter studies**   - Hospital-level database validation study in 30 hospitals: annual incidence of episodes was 2.10 (95% CI: 1.60–2.58) per million persons (2014–2016) 164 - Cross-sectional study of 35 Spanish health centers: annual incidence of episodes was 3.93 (95% CI 3.00–4.87) per million persons per year (aged ≥16 years) 169 |
| cTTP | **International hTTP registry-based studies**   - Incidence rate/person-years: 0.19 (95% CI, 0.16–0.24) (2012–2016) 207 - Annual incidence/person-year (patients aged ≤18 years; study period NRa: 0.77 (95% CI, 0.63–0.93) 213   - By sex:     - Males, 0.45 (0.30–0.64)     - Females, 1.04 (0.82–1.29)   - By age:     - 0–6 years, 1.11 (0.89–1.36)     - >6–12 years, 0.35 (0.19–0.59)     - >12–18 years, 0.29 (0.12–0.60)   - By treatment:     - Plasma prophylaxis, 0.59 (0.44–0.76)     - No plasma prophylaxis, 1.14 (0.85–1.49) - Annual incidence/person-year (patients of all agesb; 2018–2019; median follow-up 4.2 years): 0.35 (95% CI, 0.29–0.42) 212   - By sex:     - Males, 0.22 (0.16–0.30)     - Females, 0.50 (0.40–0.61)   - By age:     - <10 years, 1.18 (0.88–1.55)     - 10–20 years, 0.35 (0.23–0.50)     - 20–30 years, 0.28 (0.17–0.43)     - 30–40 years, 0.26 (0.15–0.42)     - >40 years, 0.14 (0.08–0.23)   - By treatment:     - Plasma prophylaxis, 0.36 (0.29–0.44)     - No plasma prophylaxis, 0.41 (0.30–0.56) |

**Notes:**aStudy period NR; published in 2021; bMedian at study entry (range): 26 (1.2–75).

**Abbreviations:** CI, confidence intervals; cTTP, congenital thrombotic thrombocytopenic purpura; iTTP, immune thrombotic thrombocytopenic purpura; NR, not reported.

Supplementary Table 6 Key Characteristics of Studies Reporting on the Incidence of Acute cTTP Episodes (All Based on Patients with a Confirmed cTTP Diagnosis, Enrolled in the International hTTP Registry)

| **Reference**  **(Study Period)** | **No. cTTP Patients** | **Follow-up Duration** | **Incidence of Acute cTTP Episodes**  **(First and Relapses Combined)** | | | **Incidence of Relapsed cTTP Episodes** |
| --- | --- | --- | --- | --- | --- | --- |
| Kremer Hovinga, 2017 207  (2012–2016) | 194  *Targeted age NR* | Mean: 2.8 years  (IQR: 1.6–4.9) | Incidence rate: 0.19/person-year (95% CI: 0.16–0.24) | | | 0.4 episode/year (IQR: 0.10–1.05) |
| Van Dorland, 2019 214  (2006–2017) | 123  *Targeted age NR* | NR | Median: 0.10 episode/year (range: 0.02–8.91) | | | NR |
| Tarasco, 2021b 213  (study period N/R) | 47  *Age ≤18 years* | NR | Annual incidence/person-year (95% CI): 0.77 (0.63–0.93) | | | NR |
| Males: 0.45 (0.30–0.64)  Females: 1.04 (0.82–1.29) | 0-6 years: 1.11 (0.89–1.36)  >6-12 years: 0.35 (0.19–0.59)  >12–18 years: 0.29 (0.12–0.60) | Plasma prophylaxis: 0.59 (0.44–0.76)  No plasma prophylaxis: 1.14 (0.85–1.49) |
| Tarasco, 2021a 212  (2018–2019) | 87  *All ages* | Median: 4.2 years  (range: 0.01–15) | Annual incidence/person-year (95% CI): 0.35 (0.29–0.42) | | | NR |
| Males: 0.22 (0.16–0.30)  Females: 0.50 (0.40–0.61) | <10 years: 1.18 (0.88–1.55)  10-20 years: 0.35 (0.23–0.50)  20-30 years: 0.28 (0.17–0.43)  30-40 years: 0.26 (0.15–0.42)  >40 years: 0.14 (0.08–0.23) | Plasma prophylaxis: 0.36 (0.29–0.44)  No plasma prophylaxis: 0.41 (0.30–0.56) |

**Notes:** The International hTTP Registry covers Austria, Czech Republic, Germany, Japan, Norway, Switzerland and the United States.

**Abbreviations:** CI, Confidence interval; cTTP, congenital thrombotic thrombocytopenic purpura; hTTP, hereditary thrombotic thrombocytopenic purpura IQR, interquartile range; NR, not reported.

Supplementary Table 7 Key Characteristics of Studies Reporting on Long-term Complications of cTTP

| **Reference**  **(Study Period)** | **No. cTTP Patients** | **Follow-up/Timing of Occurrence** | **Treatment** | **Long-term Complications** |
| --- | --- | --- | --- | --- |
| **Japan** | | | | |
| Sakai, 2021 211  (Apr-Sep 2020) | 55  *Targeted age NR* | Timing of occurrence NR | Fresh frozen plasma:   - Prophylactic: 74.5% (n=41) - On-demand: 25.5% (n=14) | Any persistent organ damage:   - Prophylactic FFP: 39.0% (n=16) - On-demand FFP: 0%   - p-value=0.014   Types of organ damage in patients treated with prophylactic FFP (n=41):   - Renal impairment (serum creatinine sustained at > 1.0 mg/dL): 31.7% (n=13) - Cerebral infarction: 14.6% (n=6) - Cardiac hypofunction: 2.4% (n=1) |
| **UK** | | | | |
| Alwan, 2020 217  (2005–2019) | 12  *Targeted age NR* | Median time from acute TTP episode to neuropsychology assessment: 33 months (range: 2–130) | - Plasma infusion | - Persistent cognitive symptomsa during remission at time of neuropsychology assessment: 33.3% (n=4) - Neurocognitive compromise found in those tested: 75% (n=3) |
| **International hTTP Registryb** | | | | |
| Tarasco, 2021a 212  (2018–2019) | 87  *Patients of all ages were included* | Median: 4.2 years  (range: 0.01–15) | At baseline:   - Plasma infusion prophylaxis: 57% (n=47) - Anti-aggregation or anticoagulation: 27% (n=21) - Antihypertensives: 32% (n=25) | Comorbiditiesc at enrollment:   - Neonatal hyperbilirubinemia: 43% (n=36) - Arterial thrombotic disease: 36% (n=30)   - Transient ischemic attack: 16% (n=13)   - Stroke: 27% (n=22)   - Myocardial infarction: 4.8% (n=4) - Renal insufficiency: 31% (n=26)   - Pathologic renal parameters: 20% (n=17)   - On dialysis: 9.1% (n=8)   - Kidney transplantation: 2.4% (n=2) - Neurologic disorders: 22% (n=18)   - Epileptic seizure: 7.2% (n=6)   - Headache: 3.6% (n=3)   - Other neurologic disease: 14% (n=12) - Venous thrombotic disease: 3.6% (n=3) |
| **International** | | | | |
| Borogovac, 2022 204  (2001–2020) | 226  *Patients of all ages were included* | Median: 10 years (range:1–47)d | - Prophylaxis in symptomatic patients who survived infancy: 53.1% (n=110/207) - Prophylaxis in patients who survived initial major morbidity and continued to be observed: 72.2% (n=39/54) | Initial morbidities among 217 patients who survived infancy: 33.6% (n=73)   - Stroke/Transient ischemic attack: 28.6% (n=62) - Kidney injury: 10.6% (n=10) - Cardiac injury: 3.7% (n=8)   Frequency of initial morbidities in patients with continued follow-up according to age group:   - 0-9 (n=212): 6% (n=12) - 10-19 (n=170): 12% (n=21) - 20-29 (n=129): 13% (n=17) - 30-39 (n=79): 14% (n=11) - 40-49 (n=39): 18% (n=7) - 50-59 (n=22): 18% (n=4) - 60-69 (n=11): 0 - 70-79 (n=4): 25% (n=1)   Subsequent morbidities during follow-up in patients who survived initial morbidity (n=54): 68.5% (n=37)   - Stroke/Transient ischemic attack: 38.9% (n=21) - End-stage kidney disease: 25.9% (n=14) - Other neurological abnormalities (hemiparesis, cognitive impairment): 11.1% (n=6) - Acute kidney injury: 3.7% (n=2) - Cardiac injury: 3.7% (n=2) |

**Notes:** aEvaluated using the following cognitive domains: premorbid optimal level of functioning [National Adult Reading Test (NART)], current general intellectual functioning (WAIS-III Verbal or Performance Scale IQ), verbal and non-verbal memory, naming, perception, frontal executive function and speed of information processing; bRegistry covers Austria, Czech Republic, Germany, Japan, Norway, Switzerland and the United States; cComorbidities include potential cTTP-related complications resulting from previous episodes; dIn 54 patients who survived an initial major morbidity associated with TTP.

**Abbreviations:** cTTP, congenital thrombotic thrombocytopenic purpura; FFP, fresh-frozen plasma; hTTP, hereditary thrombotic thrombocytopenic purpura; NR, not reported; TTP, thrombotic thrombocytopenic purpura.

Supplementary Table 8 Mortality Data Reported by Studies with No Reported Follow-up/Study Duration

| **Mortality Cause** | **Registry-Based Studies** | **Database-Based Studies** | **Single-Center and Multicenter Studies** |
| --- | --- | --- | --- |
| **cTTP** | | | |
| All-cause mortality | - International hTTP registry: No deaths in pediatric patients aged ≤18 years (N=47)213 - International Registry of HUS and TTP and the Milan TTP Registry: 5.6% (1996–2013; N=18)210 - Registry study based on surveys in Japan: 13.4% (2020; N=67)211 | N/A | Multicenter study (Central Norway): 8.3% (1998–2007; N=12)216 |
| TTP-related mortality | N/A | N/A | International multicenter study: 6.7% (2014; N=30)205 |
| **iTTP** | | | |
| **Among patients with initial or relapse episodes** | | | |
| All-cause mortality | N/A | Optum-Humedica database: 25.1% (2015–2019)116 | - Multicenter study: 7.3% in Spain (2015–2017)168 and 9.1% in Serbia (2004–2010)197 - Single-center studies (8 studies): - Adults: 7.4% (US, 2013–2018)144, 11.8% (Czech Republic, 1993–2016)176, and 14.8% (US, 2002–2010)126. - *Higher estimates in China*: 21.1% (2014–2020)155, 30.0% (2005–2015)201, 34.6% (2013–2017)149, and 40.0% (2012–2017)185 - Pediatric patients: No deaths in the US (2001–2019)140 |
| TTP-related mortality | Spanish TTP registry: 3.3% (2018–2020)138 | N/A | - Multicenter study (Spain): 7.4% (2015–2017)169; - Single-center study: 10.0% in the US (2004–2010)148 and 19.0% in Egypt (2016–2019)134 |
| **Among patients with initial episodes** | | | |
| All-cause mortality | - Registry of the French reference center for thrombotic microangiopathies reported mortality among 108 adult patients treated with PEX for an initial episode of iTTP (2005–2010)190:   - Before platelet count recovery: 9.3%   - Received solvent/detergent plasma: 8.6%   - Received quarantine fresh-frozen plasma: 11.1% - Spanish TTP registry: 7.8% (2004–2018)130 - Oklahoma TTP-HUS registry: 12.8% (1995–2015)156 - USTMA iTTP registry: 8.9% (Whites), 5.5% (African Americans) (2019)157 | - Japanese Diagnosis Procedure Combination inpatient database: 32.3% (in-hospital mortality) (2010–2017)200 - PMSI (national hospital discharge database): 15.2% (2012–2014)139 | Single-center study (France): 5.3% (2005–2020)174 |
| **Among patients with relapsed episodes** | | | |
| All-cause mortality | N/A | N/A | Single-center study (Turkey): 11.8% (2009–2019)141 |
| TTP-related mortality | N/A | N/A | Single-center study (Czech Republic): 5.9% (1993–2016)176 |

**Abbreviations:** cTTP, congenital thrombotic thrombocytopenic purpura; iTTP, immune thrombotic thrombocytopenic purpura; N/A, not applicable; PEX, plasma exchange; PMSI, Programme de médicalisation des systèmes d’information; TTP, thrombotic thrombocytopenic purpura; USTMA, United States Thrombotic Microangiopathy registry.

Supplementary Box 1 Burden of Illness - LOS

| **Hospital LOS** |
| --- |
| **iTTP** |
| **Registry-based studies**   - Registry of the French reference center for thrombotic microangiopathies, UK TTP Registry and Oklahoma TTP-HUS registry: median 12 (IQR: 8–24) days - 19 days (range: 4–109) 129,133,167   **Database-based studies**   - French PMSI (national hospital discharge database) and Japanese Diagnosis Procedure Combination inpatient database: median 20.0 days (IQR: 12–32) – 45 days (IQR: 25–78) 139,200 - Claims-based database (US): mean 14.5 days (SD: 10.9) 171   **Single-center and multicenter studies**   - Single-center and multicenter studies in Spain, Italy and France: median 9 days (relapsed episodes; range: 1–18) – 28 days (IQR: 22–35) 132,168,174,189 - Single-center and multicenter studies in Spain, Italy, France and US: mean 12 days (IQR: 8–20) – 20 days (SD: 20) 169,172,184,188 |
| **ICU LOS** |
| **iTTP** |
| **Registry-based studies**   - French PMSI (national hospital discharge database): median 8 days (IQR: 5–14) 139   **Database-based studies**   - Claims-based database (US): mean 8.3 days (SD: 8.2) 171   **Single-center and multicenter studies**   - Single-center study in France and multicenter study in Spain: median 4 (IQR 3–7) – 7 days (IQR: 3–13) 168,174 - Multicenter study in Spain: mean 5.5 days 169 - Single-center study in Spain: 0–2.8 days (for initial iTTP episode) 132 |

**Abbreviations:** cTTP, congenital thrombotic thrombocytopenic purpura; ICU, intensive care unit; iTTP, immune thrombotic thrombocytopenic purpura; IQR, interquartile range; LOS, length of stay; NR, not reported; SD, standard deviation.

**References**

1. Alcada J, Hockings C, Taylor A, et al. Intensive care outcomes of patients with thrombotic thrombocytopenic purpura: a single centre study [abstract OC 52.1]. *J Thromb Haemost.* 2013;11(Suppl 3):197. doi:10.1111/jth.12284

2. Al Hashmi KN, Al Dowaiki S. Thrombotic thrombocytopenic purpura in Oman; manifestations and outcome. Retrospective study. *Blood.* 2018;132(Suppl 1):5004. doi:10.1182/blood-2018-99-115227

3. Ashida A, Matsumura H, Sawai T, et al. Clinical features in a series of 258 Japanese pediatric patients with thrombotic microangiopathy. *Clin Exp Nephrol.* 2018;22(4):924−930. doi:10.1007/s10157-018-1531-0

4. Aryal M, Pathak R, Giri S, Bhatt VR. Recent trends in the incidence and outcomes of thrombotic thrombocytopenic purpura in the United States: data from the 2009-2014 National Inpatient Sample. *Blood.* 2017;130(Suppl 1):2086. doi:10.1182/blood.V130.Suppl_1.2086.2086

5. Balasubramaniyam N, Kolte D, Palaniswamy C, et al. Predictors of in-hospital mortality and acute myocardial infarction in thrombotic thrombocytopenic purpura. *Am J Med.* 2013;126(11):1016.e1−7. doi:10.1016/j.amjmed.2013.03.021

6. Balasubramaniyam N, Yandrapalli S, Kolte D, Pemmasani G, Janakiram M, Frishman WH. Cardiovascular complications and their association with mortality in patients with thrombotic thrombocytopenic purpura. *Am J Med.* 2021;134(2):e89–e97. doi:10.1016/j.amjmed.2020.06.020

7. Berg AN, Rollins-Raval MA, K. P-P, Nichols L, Raval JS. Causes of death in patients with thrombotic thrombocytopenic purpura (TTP): a single institution 22-year autopsy cohort [abstract 1]. *Lab Invest.* 2013;93(Suppl 1):4A. doi:10.1038/labinvest.2013.12

8. Bhesania S, Sharath D, Pandya S, et al. The ADAMTS13 family: in-patient trends and outcomes of thrombotic thrombocytopenic purpura. *Blood.* 2021;136(Suppl 1):40. doi:10.1182/blood-2020-141714

9. Blombery P, Kivivali L, Pepperell D, et al. Diagnosis and management of thrombotic thrombocytopenic purpura (TTP) in Australia: findings from the first 5 years of the Australian TTP/thrombotic microangiopathy registry. *Intern Med J.* 2016;46(1):71−79. doi:10.1111/imj.12935

10. Bookhout CEP, Younisn A, Raval JS, Mazepa MA, Brecher ME. Duration of plasma exchange and frequency of exacerbations in new-onset idiopathic thrombotic thrombocytopenic purpura with ADAMTS-13 deficiency. *J Clin Apher.* 2013;28(2):93. doi:10.1002/jca.21272

11. Bugarin-Estrada E, Gómez-De León A, López-García YK, et al. Clinical presentation in thrombotic thrombocytopenic purpura: Real-world data from two Mexican institutions. *J Clin Apher.* 2018;33(6):645–653. doi:10.1002/jca.21659

12. Bull T, McCulloch R, Nicolson P, et al. Factors influencing time from initial presentation to start of plasma exchange (PEX) in patients with acute thrombotic thrombocytopenic purpura (TTP) [abstract BSH2021-OR-026]. *Br J Haematol.* 2021;193(Suppl 1):27–28. doi:10.1111/bjh.17490

13. Castro JTdS, Mazetto BDM, Rosa AP, et al. Association of plasmic score with neurological symptoms in patients with thrombotic thrombocytopenic purpura (TTP) [abstract PB1885]. *Res Pract Thromb Haemost.* 2020;4(Suppl 1):934–935. doi:10.1002/rth2.12393

14. Chang PY, Ho CL, Chao TY, et al. Diagnosis and treatment of thrombotic thrombocytopenic purpura: a single institution experience. *J Med Sci (Taiwan).* 2012;32(3):121–127. doi:10.6136/JMS.2012.32(3).121

15. Chaturvedi S, Abbas H, McCrae KR. Increased morbidity during long-term follow-up of survivors of thrombotic thrombocytopenic purpura [letter to the editor]. *Am J Hematol.* 2015;90(10):E208. doi:10.1002/ajh.24138

16. Chaturvedi S, Dane K, Kasmani J. Persistently low ADAMTS-13 activity in remission is associated with stroke in TTP survivors. *Haemophilia.* 2019;25(Suppl 2):17–18. doi:10.1111/hae.13786

17. Chaturvedi S, Carcioppolo D, Zhang L, McCrae KR. Management and outcomes for patients with TTP: analysis of 100 cases at a single institution. *Am J Hematol.* 2013;88(7):560–565. doi:10.1002/ajh.23455

18. Chinthammitr Y, Wangchinda W. Clinical characteristics and outcome of patients with thrombotic thrombocytopenic purpura at Siriraj Hospital [abstract 704]. *Res Pract Thromb Haemost.* 2017;1(Suppl 1):1298. doi:10.1002/rth2.12012open_in_new

19. Chu LPB, Barnhard S, Wun T. Survival and relapse in Californians with thrombotic thrombocytopenic purpura. *J Clin Apher.* 2019;34(Suppl 2):102–103. doi:10.1002/jca.21704

20. Cohen Y, Miller L, Mandel M, et al. PLASMIC score predicts outcome of transplanted patients with severe thrombotic thrombocytopenic purpura [abstract PB1868]. *Res Pract Thromb Haemost.* 2020;4(Suppl 1):923. doi:10.1002/rth2.12393

21. Cuicui L, Tiantian S, Mankai J, et al. The clinical analysis of 58 thromboticthrombocytopenic purpura patients [abstract PO566-TUE]. *J Thromb Haemost.* 2015;13:712. doi:10.111.jth12993

22. Coppo P. Thrombotic thrombocytopenic purpura. 2021. Available from: <https://www.orpha.net/consor/cgi-bin/OC_Exp.php?lng=EN&Expert=54057>. Accessed December 20, 2022.

23. Dahlan R, Sontrop JM, Li L, Ghadieh O, Clark WF. Primary and secondary thrombotic microangiopathy referred to a single plasma exchange center for suspected thrombotic thrombocytopenic purpura: 2000-2011. *Am J Nephrol.* 2015;41(6):429–437. doi:10.1159/000437001

24. Davies G, Valentine K, Goodarzi Z, Sayani F. Thrombotic thrombocytopenic purpura (TTP) management at Foothills Medical Centre: A retrospective analysis between 2005–2010 (Tertiary Centre, Calgary). *Blood.* 2015;126(23):4654. doi:10.1182/blood.V126.23.4654.4654

25. Davis E, Antun AG, Baumann Kreuziger L, et al. A descriptive analysis of the demographics and presenting symptoms of patients in the U.S. Thrombotic Microangiopathy (USTMA) TTP registry. *Blood.* 2017;130(Suppl 1):1049. doi:10.1182/blood.V130.Suppl_1.1049.1049

26. De Marinis G, Lombardi A, Fabris F. Differential diagnosis of thrombotic microangiopathy: data from Padova TTP case series. *Haematologica.* 2013;98(Suppl 3):44–45.

27. Deford CC, Schwartz LH, Perdue JJ, et al. Severe depression following recovery from thrombotic thrombocytopenic purpura (TTP). *Blood.* 2012;120(21):366. doi:10.1182/blood.V120.21.366.366

28. Demir C, Altıntaş A, Paşa S, Ali Kaplan M, Küçükzeybek Y, Ayyildiz O. Assessment of patients with thrombotic thrombocytopenic purpura. *Eastern Journal of Medicine.* 2010;15(1):15−20.

29. Deng MY, Zhang GS, Zhang Y, et al. Analysis of clinical and laboratory characteristics in 42 patients with thrombotic thrombocytopenic purpura from a single center in China. *Transfus Apher Sci.* 2013;49(3):447−452. doi:10.1016/j.transci.2013.07.026

30. El-Husseiny NM, Goubran H, Fahmy HM, et al. Outcome and relapse risks of thrombotic thrombocytopaenic purpura: an Egyptian experience. *Postgrad Med J.* 2012;88(1042):433−436. doi:10.1136/postgradmedj-2011-130375

31. Engelbrecht S, Sloane J, McQuilten Z, et al. Management, complications of therapy and outcomes of TTP in Australia: data from the national registry. *Vox Sang.* 2013;105(Suppl 1):255. doi:10.1111/vox.12048

32. Engelbrecht S, McQuilten Z, Best R, et al. Underlying precipitants do not influence clinical presentation or therapy for TTP: data from the Australian registry [abstract 3D-S16-04]. *Vox Sang.* 2013;105(Suppl 2):34−35. doi:10.1111/vox.12100_1

33. Esteban Figuerola A, Olona Cabases MM, Vallansot R, et al. A retrospective study of the thrombotic microangiopathies diagnosed in the last 17 years in one single centre [abstract E1426]. *Haematologica* 2017;102(Suppl 2):583–584.

34. Falter T, Schmitt V, Boeschen S, et al. Prevalence of depression in patients with diagnosis of thrombotic thrombocytopenic purpura (TTP) [abstract A13]. *Pharmacopsychiatry.* 2015;25(06). doi:10.1055/s-0035-1557951

35. Ferrari B, Maino A, Artoni A, et al. Evaluation of long term neurological sequelae after a first episode of thrombotic thrombocytopenic purpura [abstract PO574-TUE]. *J Thromb Haemost.* 2015;13(Suppl 2):715. doi:10.1111/jth.12993

36. Fourmont AM, Zafrani L, Mariotte E, et al. The clinical features of cardiac involvement in patients with severe thrombotic thrombocytopenic purpura. *Intensive Care Med.* 2018;44(6):963–965. doi:10.1007/s00134-018-5216-7

37. Gandhi K, Aronow WS, Desai H, et al. Cardiovascular manifestations in patients with thrombotic thrombocytopenic purpura: a single-center experience. *Clin Cardiol.* 2010;33(4):213–216. doi:10.1002/clc.20731

38. Gao L, Kao G. Risk factors associated with multiple end-organ damage in idiopathic thrombotic thrombocytopenic purpura (TTP) patients. *Blood.* 2016;128(22):4928. doi:10.1182/blood.V128.22.4928.4928

39. Giri S, Pathak R, Aryal MR, Karmacharya P, Martin MG. Weekend versus weekday mortality for thrombotic thrombocytopenic purpura (TTP) related hospitalizations in the United States: data from the National Inpatient Sample. *Blood.* 2014;124(21):4863. doi:10.1182/blood.V124.21.4863.4863

40. Goel R, King KE, Takemoto CM, Ness PM, Tobian AA. Prognostic risk-stratified score for predicting mortality in hospitalized patients with thrombotic thrombocytopenic purpura: nationally representative data from 2007 to 2012. *Transfusion.* 2016;56(6):1451–1458. doi:10.1111/trf.13586

41. Henry N, Mellaza C, Fage N, et al. Retrospective and systematic analysis of causes and outcomes of thrombotic microangiopathies in routine clinical practice: an 11-year study. *Front Med (Lausanne).* 2021;8:566678. doi:10.3389/fmed.2021.566678

42. Heizmann M, Hovinga JAK, Merki RO, Bergetzi MJ. Survival, relapse and outcome in patients with idiopathic thrombotic thrombocytopenic purpura: a single center experience [abstract P-WE-474]. *J Thromb Haemost.* 2011;9(Suppl 2):669. doi:10.1111/j.1538-7836.2011.04380_3.x

43. Herold S, Falter T, Schmitt V, et al. Retrospective analysis of the relapse rate in patients surviving acute acquired thrombotic thrombocytopenic purpura (TTP) treated with or without rituximab [abstract PB 701]. *Res Pract Thromb Haemost.* 2017;1(Suppl 1):1297. doi:10.1002/rth2.12012

44. Hofmann JC, Kiprov DD, Lewis BH. Utility of a novel genetic assay to confirm the diagnosis of complement-mediated thrombotic microangiopathy. *Transfusion.* 2016;56(Suppl 4):41A. doi:10.1111/trf.13807

45. Houstoun M, Reichman ME, Graham DJ, et al. Quinine sulfate use and hematologic adverse events: active surveillance in Medicare. *Pharmacoepidemiol Drug Saf.* 2013;22(Suppl 1):91. doi:10.1002/pds.3512

46. Hussein E, Teruya J. Evaluating the impact of the ABO blood group on the clinical outcome of thrombotic thrombocytopenic purpura associated with severe ADAMTS13 deficiency. *Vox Sang.* 2017;112(5):434–442. doi:10.1111/vox.12511

47. Hussein EA. Idiopathic TTP in the Middle East: epidemiology and clinical outcomes in infection associated episodes. *Transfus Apher Sci.* 2020;59(6):102916. doi:10.1016/j.transci.2020.102916

48. Iqbal S, Tailor I, Zaidi S, et al. Durable long term remissions with early use of rituximab in patients with thrombotic thrombocytopenic purpura (TTP) [abstract E1558]. *Haematologica.* 2015;100(Suppl 1):623.

49. Iqbal S, Zaidi SRH, Motabi IH, et al. Analysis of clinical features, laboratory characteristics and therapeutic outcome in patients with thrombotic thrombocytopenic purpura treated at King Fahad Medical City, Riyadh, Saudi Arabia. *Blood.* 2016;128(22). doi:10.1182/blood.V128.22.4915.4915

50. Isbel N, Wilkins S, Sloane J, et al. The TTP registry: initial data from a new registry [abstract 10]. *Nephrology.* 2012;17(Suppl 2):56. doi:10.1111/j.1440-1797.2012.01632.x

51. Jang MJ, Chong SY, Kim IH, et al. Clinical features of severe acquired ADAMTS13 deficiency in thrombotic thrombocytopenic purpura: the Korean TTP registry experience. *Int J Hematol.* 2011;93(2):163–169. doi:10.1007/s12185-011-0771-5

52. John ML, Scharrer I. Autoimmune disorders in patients with idiopathic thrombotic thrombocytopenic purpura. *Hamostaseologie.* 2012;32(Suppl 1):S86–S89.

53. Khwaja JS, Scully M, Mc Guckin S. Presenting features of idiopathic thrombotic thrombocytopenic purpura [abstract PO-184]. *Br J Haematol.* 2017;176(Suppl 1):127. doi:10.1111/bjh.14613

54. Knott A, Reilly-Stitt C, Suntharalingham S, Clark A. A retrospective review of suspected thrombotic thrombocytopenic purpura cases from a tertiary referral centre [abstract BSH2020-EP-165]. *Br J Haematol.* 2020;189(Suppl 1):273–274. doi:10.1111/bjh.16638

55. Korkmaz S, Keklik M, Sivgin S, et al. Therapeutic plasma exchange in patients with thrombotic thrombocytopenic purpura: a retrospective multicenter study. *Transfus Apher Sci.* 2013;48(3):353–358. doi:10.1016/j.transci.2013.04.016

56. Lannon M, Murphy P, Wallis J, Maddox J, Biss T. A regional experience of ADAMTS13 testing, thrombotic thrombocytopenic purpura (TTP) diagnosis and outcome [abstract 80]. *Br J Haematol.* 2016;173(S1):40. doi:10.1111/bjh.14019

57. Lester W, Begaj I, Ray D, Pagano D. Trends in diagnosis and mortality from thrombotic thrombocytopenic purpura in England from 2003 to 2013: are we improving outcomes? [abstract 100]. *Br J Haematol.* 2015;169(Suppl 1):44. doi:10.1111/bjh.13350

58. Li A, Makar RS, Hurwitz S, et al. Therapeutic plasma exchange for the treatment of thrombotic microangiopathy without severe ADAMTS13 deficiency: a propensity score-matched study. *Blood.* 2015;126(23):3471. doi:10.1182/blood.V126.23.3471.3471

59. Liu C, Kallogjeri D, Dynis M, Grossman BJ. Platelet recovery rate during plasma exchange predicts early and late responses in patients with thrombotic thrombocytopenic purpura (CME). *Transfusion.* 2013;53(5):1096–1107. doi:10.1111/j.1537-2995.2012.03857.x

60. Liu Y, Han H, Wei X, Wang Q, Thakkar A, He J. Outcomes of early plasmapheresis vs late plasmapheresis in patients with thrombocytopenic thrombotic purpura: a nationwide analysis from 2005-2014. *Blood.* 2017;130(Suppl 1):3640. doi:10.1182/blood.V130.Suppl_1.3640.3640

61. Lotta LA, Mariani M, Consonni D, et al. Different clinical severity of first episodes and recurrences of thrombotic thrombocytopenic purpura. *Br J Haematol.* 2010;151(5):488-494. doi:10.1111/j.1365-2141.2010.08385.x

62. Makroo RN, Chowdhry M, Nayak S, Bhatia A, Nl R. Platelet transfusion in cases of TTP undergoing therapeutic plasma exchange: retrospective analysis of 5 years [abstract 484]. *Vox Sang.* 2014;107(Suppl 1):211.

63. Mancio PRL, Castillo RID. Clinical and laboratory profile of patients with thrombotic thrombocytopenic purpura seen at the University of Sto. Tomas Hospital: a single center experience. *Philipp J Intern Med.* 2015;53(1):1–4.

64. Mariotte E, Blet A, Galicier L, et al. Unresponsive thrombotic thrombocytopenic purpura in critically ill adults. *Intensive Care Med.* 2013;39(7):1272–1281. doi:10.1007/s00134-013-2873-4

65. Mariotte E, Azoulay E, Galicier L, et al. Epidemiology and pathophysiology of adulthood-onset thrombotic microangiopathy with severe ADAMTS13 deficiency (thrombotic thrombocytopenic purpura): a cross-sectional analysis of the French national registry for thrombotic microangiopathy. *Lancet Haematol.* 2016;3(5):e237–e245. doi:10.1016/s2352-3026(16)30018-7

66. Mariotte E, Zafrani L, Galicier L, et al. Rituximab‑related complications in severe thrombotic thrombocytopenic purpura patients [abstract 071]. *Ann Intensive Care.* 2017;7(Suppl 1):39−40. doi:10.1186/s13613-016-0223-8

67. McCleskey BC, Adamski SJ, Vetter T, Marques M. In search of demographic and laboratory characteristics associated with increased risk of exacerbation and relapse in idiopathic thrombotic thrombocytopenic purpura. *J Clin Apher.* 2013;28(2):136–137. doi:10.1002/jca.21272

68. Merlen C, Pépin E, Barry O, et al. Incidence of thrombotic microangiopathies in Quebec: an 8-year overview from a laboratory centralizing Adamts-13 testing. *Blood.* 2021;138(Suppl 1):4222. doi:10.1182/blood-2021-153072

69. Mirouse A, Legriel S, Chevret S, et al. Thrombotic thrombocytopenic purpura related neurological manifestations: clusters at presentation and long-term prognosis [abstract CO-20]. *Ann Intensive Care.* 2020;10(Suppl 1):13. doi:10.1186/s13613-020-0623-7

70. Mirouse A, Legriel S, Dumas G, et al. Pattern of brain injury in patients with thrombotic thrombocytopenic purpura in the precaplacizumab era. *Crit Care Med.* 2021;49(10):e931–e940. doi:10.1097/ccm.0000000000005164

71. Nichols L, Berg A, Rollins-Raval MA, Raval JS. Cardiac injury is a common postmortem finding in thrombotic thrombocytopenic purpura patients: is empiric cardiac monitoring and protection needed? *Ther Apher Dial.* 2015;19(1):87−92. doi:10.1111/1744-9987.12191

72. O'Brien KL, Price TH, Howell C, Delaney M. The use of 50% albumin/plasma replacement fluid in therapeutic plasma exchange for thrombotic thrombocytopenic purpura. *J Clin Apher.* 2013;28(6):416−421. doi:10.1002/jca.21288

73. Obeidat MB, Al-Swailmeen AM, Bawa'neh AS, Arabeiat AM, AbuKamar AS, Almomani AO. Thrombotic thrombocytopenic purpura: a single-center experience in Jordan. *National Journal of Medical Research.* 2020;10(01):16−20.

74. Oh D, Kim IH, Jung CW, Le JW, Lee HG, Sohn SK. Clinical features of patient with severe acquired ADAMTS-13 deficiency in thrombotic thrombocytopenic purpura [abstract E1407]. *Haematologica.* 2015;100(Suppl 1):565.

75. Oh J, Oh D, Lee SJ, et al. Prognostic utility of ADAMTS13 activity for the atypical hemolytic uremic syndrome (aHUS) and comparison of complement serology between aHUS and thrombotic thrombocytopenic purpura. *Blood Res.* 2019;54(3):218−228. doi:10.5045/br.2019.54.3.218

76. Ongoren Aydin SS, Apaydin T, Salihoglu A, et al. The efficacy of vincristine in the treatment of patients with relapsed/refractory thrombotic thrombocytopenic purpura [abstract P1234]. *Haematologica.* 2014;99(Suppl 1):474.

77. Pathak R, Aryal MR, Giri S, Karmacharya P, Donato AA. Cardiac complications in thrombotic thrombocytopenic purpura: data from nationwide inpatient sample. *Blood.* 2014;124(21):2793. doi:10.1182/blood.V124.21.2793.2793

78. Pishko AM, Arepally GM. Predicting the temporal course of laboratory abnormality resolution in patients with thrombotic microangiopathy. *Blood.* 2014;124(21):4192. doi:10.1182/blood.V124.21.4192.4192

79. Ramachandran P, Erdinc B, Abowali HA, Zahid U, Gotlieb V, Spitalewitz S. High incidence of thrombotic thrombocytopenic purpura exacerbation rate among patients with morbid obesity and drug abuse. *Cureus.* 2021;13(4):e14656. doi:10.7759/cureus.14656

80. Raval JS, Park Y, Garrett E, Ipe TS, Srivaths PR. The first report of the American Society for Apheresis Thrombotic Thrombocytopenic Purpura Multiinstitutional Registry: 2019-2020. *J Clin Apher.* 2021;36(2):227−228. doi:10.1002/jca.21896

81. Reese JA, Al-Nouri ZL, Deford CC, et al. Mortality and morbidities during long-term follow-up after recovery from thrombotic thrombocytopenic purpura (TTP) *Blood.* 2012;120(21):362. doi:10.1182/blood.V120.21.362.362

82. Reese JA, Muthurajah DS, Kremer Hovinga JA, Vesely SK, Terrell DR, George JN. Children and adults with thrombotic thrombocytopenic purpura associated with severe, acquired Adamts13 deficiency: comparison of incidence, demographic and clinical features. *Pediatr Blood Cancer.* 2013;60(10):1676−1682. doi:10.1002/pbc.24612

83. Roriz M, Landais M, Desprez J, et al. Risk factors for autoimmune diseases development after thrombotic thrombocytopenic purpura. *Medicine (Baltimore).* 2015;94(42):e1598. doi:10.1097/MD.0000000000001598

84. Sanci V, Saidenberg E, Tinmouth A. Therapeutic plasma exchange with or without rituximab to treat thrombotic thrombocytopenic purpura: significantly different treatment efficiencies. *J Clin Apher.* 2015;30(2):90−91. doi:10.1002/jca.21385

85. Saracevic M, Vucelic D, Savic N, et al. Recurrent disease in patients with thromboticthrombocytopenic purpura: data from Serbian TTP Registry [abstract PB 2.73-6]. *J Thromb Haemost.* 2013;11(Suppl 2):757. doi:10.1111/jth.12284

86. Sawler D, Parker A, Ferland J, Karathra J, Goodyear MD, Sun H. Time from suspected thrombotic thrombocytopenic purpura to initiation of plasma exchange in Alberta, Canada and impact on survival: 10-year provincial retrospective cohort study. *Res Pract Thromb Haemost.* 2019;3(Suppl 1):749−750.

87. Scott J, McCleskey B, Adamski J, Vetter T, Marques MB. Does ADAMTS-13 inhibitor titer correlate with response to therapeutic plasma exchange in thrombotic thrombocytopenic purpura? *J Clin Apher.* 2013;28(2):87−88. doi:10.1002/jca.21272

88. Scully M, Yarranton H, Liesner R, et al. Regional UK TTP registry: correlation with laboratory ADAMTS 13 analysis and clinical features. *Br J Haematol.* 2008;142(5):819−826. doi:10.1111/j.1365-2141.2008.07276.x

89. Selvakumar S, Chaturvedi S, Yu J, Moliterno A, Streiff M, Brodsky R. Reduced health-related quality of life is associated with depression and cognitive impairment among survivors of thrombotic thrombocytopenic purpura. *Res Pract Thromb Haemost.* 2021;5(Suppl 1):e12554. doi:10.1002/rth2.12554

90. Shah N, Matevosyan K, Burner J, Sarode R. ADAMTS13 helps distinguish thrombotic thrombocytopenic purpura from other microangiopathies and guide necessity of plasma exchange therapy. *Blood.* 2011;118(21):2328. doi:10.1182/blood.V118.21.2328.2328

91. Shah N, Rutherford C, Matevosyan K, Shen YM, Sarode R. Role of ADAMTS13 in the management of thrombotic microangiopathies including thrombotic thrombocytopenic purpura (TTP). *Br J Haematol.* 2013;163(4):514−519. doi:10.1111/bjh.12569

92. Sharma P, Gurung A, Dahal S. Connective tissue disorders in patients with thrombotic thrombocytopenic purpura: a retrospective analysis using a national database. *J Clin Med Res.* 2019;11(7):509−514. doi:10.14740/jocmr3850

93. Shin J-S, Alwan F, Scully M. Thrombotic thrombocytopenic purpura: 10 year analysis of the United Kingdom TTP registry. *Res Pract Thromb Haemost.* 2019;3(Suppl 1):194. doi:10.1002/rth2.12227

94. Sousa R, Andrade S, Maia M, Lopes H. Identify patients with RARE diseases in Portugal: acquired thrombotic thrombocytopenic purpura (aTTP) [abstract PRO61]. *Value Health.* 2020;23:S700−S701. doi:10.1016/j.jval.2020.08.1797

95. Subramanian KS, Kolte D, Syed RZ, et al. Predictors of stroke in hospitalized patients with thrombotic thrombocytopenic purpura [abstract 201]. *Circ Cardiovasc Qual Outcomes.* 2013;6(Suppl 1):A201. doi:10.1161/circoutcomes.6.suppl_1.A201

96. Swart L, Schapkaitz E, Mahlangu JN. Thrombotic thrombocytopenic purpura: A 5-year tertiary care centre experience. *J Clin Apher.* 2019;34(1):44−50. doi:10.1002/jca.21673

97. Taha R, Omri H, Ibrahim F, Hijji I, Sabbah H, Ayoubi H. Rituximab therapy in refractory and relapsed thrombotic thrombocytopenic purpura; a retrospective analysis of a single centre in Qatar [abstract B1912]. *Haematologica.* 2013;98 (Suppl 1):734.

98. Terrell D, Cataland S, Beebe L, et al. Impact of residual effects and complications of thrombotic thrombocytopenic purpura (TTP) on daily living: a qualitative study. *Blood.* 2019;134 (Suppl 1):931.

99. Thomas W, Page C, Boraks P, Baglin T. Single tertiary centre experience of treating thrombotic thrombocytopenic purpura between 2010–2015 [abstract 99]. *Br J Haematol.* 2016;173(Suppl 1):47. doi:10.1111/bjh.14019

100. Tse B, Lim G, Sholzberg M, Pavenski K. Describing the point prevalence and characteristics of venous thromboembolism in patients with thrombotic thrombocytopenic purpura *Blood.* 2019;134 (Suppl 1):2381. doi:10.1182/blood-2019-123081

101. Ugur Bilgin A, Karaselek MA, Camli K. Therapeutic plasma exchange for patients with thrombotic thrombocytopenic purpura: The experience of Konya University [abstract P-50]. *Transfus Apher Sci.* 2012;47(Suppl 1):S44−S45. doi:10.1016/S1473-0502(12)70086-1

102. Umapathi KK, Thavamani A, Puliyel M. Predictors of in-hospital mortality in thrombotic thrombocytopenic purpura in children in the United States: a population analysis. *J Pediatr Hematol Oncol.* 2020;42(5):e340−e344. doi:10.1097/mph.0000000000001725

103. Van de Louw A, Mariotte E, Darmon M, Cohrs A, Leslie D, Azoulay E. Outcomes in 1096 patients with severe thrombotic thrombocytopenic purpura before the caplacizumab era. *PLoS One.* 2021;16(8):e0256024. doi:10.1371/journal.pone.0256024

104. Vesely SK. Life after acquired thrombotic thrombocytopenic purpura: morbidity, mortality, and risks during pregnancy. *J Thromb Haemost.* 2015;13(Suppl 1):S216-S222. doi:10.1111/jth.12953

105. Völker LA, Kaufeld J, Miesbach W, et al. Real-world data confirm the effectiveness of caplacizumab in acquired thrombotic thrombocytopenic purpura. *Blood Adv.* 2020;4(13):3085–3092. doi:10.1182/bloodadvances.2020001973

106. Wahl PM, Bohn RL, Terrell DR, George JN, Ewenstein B. Health care utilization of patients diagnosed with idiopathic thrombotic thrombocytopenic purpura in a commercially insured population in the United States. *Transfusion.* 2012;52(7):1614–1621. doi:10.1111/j.1537-2995.2012.03758.x

107. Wong H, Benjamin S. NHSBT national therapeutic apheresis services standardised practice results in excellent patient outcomes in TTP [abstract P-697]. *Vox Sang.* 2015;109(Suppl 1):323. doi:10.1111/vox.12304

108. Wu H, Kiel M, Shi Q. Pulmonary manifestations in patients with thrombotic thrombocytopenic purpura at a community hospital setting. *Chest.* 2013;144 (Suppl 4):365A. doi:10.1378/chest.1703532

109. Xiyan W, Xiaofan L, Feng X, et al. Clinical analysis of 83 patients with thrombotic thrombocytopenic purpura [abstract PB1867]. *Res Pract Thromb Haemost.* 2020;4(Suppl 1):922–923. doi:10.1002/rth2.12393

110. Zafrani L, Mariotte E, Darmon M, et al. Acute renal failure is prevalent in patients with thrombotic thrombocytopenic purpura associated with low plasma ADAMTS13 activity. *J Thromb Haemost.* 2015;13(3):380–389. doi:10.1111/jth.12826

111. Zhan H, Streiff MB, King KE, Segal JB. Thrombotic thrombocytopenic purpura at the Johns Hopkins Hospital from 1992 to 2008: clinical outcomes and risk factors for relapse. *Transfusion.* 2010;50(4):868–874. doi:10.1111/j.1537-2995.2009.02528.x

112. Zhang T, Zhou D, Wu H. Thrombotic thrombocytopenic purpura: a challenging devil underestimated—experience with 65 patients from two centers [abstract APL16-0890]. *Int J Rheum Dis.* 2016;19(Suppl 2):264. doi:10.1111/1756-185X.12962

113. Zhang Z, Yuan X, Jiang Y, Li N, Li B. Effectiveness of lymphoplasmapheresis compared with therapeutic plasma exchange for thrombotic thrombocytopenic purpura: a retrospective evaluation. *Hematology.* 2022;27(1):167–172. doi:10.1080/16078454.2021.2015842

114. Abou-Ismail MY, Arafah Y, Fu P, Cao S, Schmaier AH, Nayak LV. Outcomes after treatment with upfront cyclophosphamide or rituximab for initial acquired thrombotic thrombocytopenic purpura. *Blood.* 2019;134(Suppl 1):1084. doi:10.1182/blood-2019-123537

115. Abou-Ismail MY, Arafah Y, Fu P, Cao S, Schmaier AH, Nayak L. Outcomes of immune thrombotic thrombocytopenic purpura (iTTP) with upfront cyclophosphamide vs. rituximab. *Front Med (Lausanne).* 2020;7:588526. doi:10.3389/fmed.2020.588526

116. Adeyemi A, Callewaert F, Razakariasa F, de Passos Sousa R. Epidemiology, treatment patterns, and clinical outcomes among patients with acquired thrombotic thrombocytopenic purpura (ATTP) in the United States: an electronic health records analysis. *Hematol Transfus Cell Ther.* 2021;43(Suppl 3):S47.

117. Agosti P, Mancini I, Artoni A, et al. The features of acquired thrombotic thrombocytopenic purpura occurring at advanced age. *Thromb Res.* 2020;187:197–201. doi:10.1016/j.thromres.2019.10.010

118. Alwan F, Vendramin C, Vanhoorelbeke K, et al. Presenting ADAMTS13 antibody and antigen levels predict prognosis in immune-mediated thrombotic thrombocytopenic purpura. *Blood.* 2017;130(4):466–471. doi:10.1182/blood-2016-12-758656

119. Artoni A, Canavasi E, Mancini I, et al. Rituximab use is associated with longer relapse free survival in patients with acquired thrombotic thrombocytopenic purpura [abstract OC 63.5]. *Res Pract Thromb Haemost.* 2017;1(Suppl 1):264. doi:10.1002/rth2.12012

120. Béranger N, Benghezal S, Savigny S, et al. Loss of von Willebrand factor high-molecular-weight multimers at acute phase is associated with detectable anti-ADAMTS13 IgG and neurological symptoms in acquired thrombotic thrombocytopenic purpura. *Thromb Res.* 2019;181:29–35. doi:10.1016/j.thromres.2019.07.012

121. Bertomoro A, Bertozzi I, Boscaro F, Cerbo A, Lombardi AM, Fabris F. Clinical prognostic factors for the management of patients with acquired thrombotic thrombocytopenic purpura (aTTP). *Blood Transfus.* 2020;18(Suppl 4):S524–S525. doi:10.2450/2020.S4

122. Bettoni G, Palla R, Valsecchi C, et al. ADAMTS-13 activity and autoantibodies classes and subclasses as prognostic predictors in acquired thrombotic thrombocytopenic purpura. *J Thromb Haemost.* 2012;10(8):1556–1565. doi:10.1111/j.1538-7836.2012.04808.x

123. Bichard C, Mancini I, Agosti P, et al. Efficacy and safety of azathioprine during remission of immune-mediated thrombotic thrombocytopenic purpura. *Blood.* 2021;138(Suppl 1):773. doi:10.1182/blood-2021-150841

124. Boothby A, Evans M, Gangaraju R, et al. Use of preemptive treatment for immune thrombotic thrombocytopenic purpura: A matched survival analysis. *Blood.* 2021;138(Suppl 1):2084. doi:10.1182/blood-2021-149984

125. Brodsky MA, Sukumar S, Selvakumar S, et al. Major adverse cardiovascular events in survivors of immune-mediated thrombotic thrombocytopenic purpura. *Am J Hematol.* 2021;96(12):1587–1594. doi:10.1002/ajh.26341

126. Cataland S, Yang S, Wu H. Pretreatment ADAMTS13 antibody concentration and age predicts relapse in patients with newly diagnosed acquired thrombotic thrombocytopenic pupura (TTP). *J Thromb Haemost.* 2013;11(Suppl 3):72–73. doi:10.1111/jth.12443

127. Chauvel F, Reboul P, Cariou S, et al. Use of double filtration plasmapheresis for the treatment of acquired thrombocytopenic thrombotic purpura. *Ther Apher Dial.* 2020;24(6):709–717. doi:10.1111/1744-9987.13477

128. Colling M, Sun L, Upadhyay V, et al. Deaths and complications associated with the management of acute immune thrombotic thrombocytopenic purpura. *Transfusion.* 2020;60(4):841–846. doi:10.1111/trf.15721

129. Coppo P, Bubenheim M, Azoulay E, et al. A regimen with caplacizumab, immunosuppression, and plasma exchange prevents unfavorable outcomes in immune-mediated TTP. *Blood.* 2021;137(6):733–742. doi:10.1182/blood.2020008021

130. del Rio-Garma J, Bobillo S, De La Rubia J, et al. Factors associated with mortality in patients experiencing first episodes of acquired thrombotic thrombocytopenic purpura (aTTP). Results of the Spanish TTP registry. *Blood.* 2019;134(Suppl 1):1082. doi:10.1182/blood-2019-122665

131. del Río-Garma J, Bobillo S, de la Rubia J, et al. Mortality in acquired thrombotic thrombocytopenic purpura in the pre-caplacizumab era. *Ann Hematol.* 2022;101(1):59–67. doi:10.1007/s00277-021-04685-8

132. Domingo-González A, Regalado-Artamendi I, Martín-Rojas RM, et al. Application of the French TMA Reference Center Score and the mortality in TTP Score in de novo and relapsed episodes of acquired thrombotic thrombocytopenic purpura at a tertiary care facility in Spain. *J Clin Apher.* 2021;36(3):420–428. doi:10.1002/jca.21880

133. Dutt T, Shaw RJ, Stubbs M, et al. Real-world experience with caplacizumab in the management of acute TTP. *Blood.* 2021;137(13):1731–1740. doi:10.1182/blood.2020007599

134. El-Ashwah S, Jamal E, Shemies RS, Mortada MI, Ghannam MA, Shaaban Y. Neurological presentation predicting immune thrombotic thrombocytopenic purpura outcome. *Acta Haematol Pol.* 2021;52(1):48–53. doi:10.5603/AHP.2021.0007

135. Faisal A, Liles D, Park Y, Sridharan M. ADAMS-TS13 inhibitor level and risk of relapse in acquired idiopathic thrombotic thrombocytopenic purpura. *Blood.* 2021;138(Suppl 1):1012. doi:10.1182/blood-2021-149338

136. Falter T, Herold S, Weyer-Elberich V, et al. Relapse rate in survivors of acute autoimmune thrombotic thrombocytopenic purpura treated with or without rituximab. *Thromb Haemost.* 2018;118(10):1743–1751.

137. Fianchi L, Criscuolo M, Lancellotti S, et al. Low-dose rituximab as pre-emptive therapy in multi-relapsing and primary refractory patients with acquired idiopathic thrombotic thrombocytopenic purpura: a monocentric retrospective study. *Haematologica.* 2016;101:591–592.

138. Garcia-Garcia I, Jiménez M, Valcárcel D, et al. Caplacizumab as new paradigm-changing therapy for patients with autoimmune thrombotic thrombocytopenic purpura (aTTP): real-world data from TTP Spanish registry. *Blood.* 2020;136:20–21. doi:10.1182/blood-2020-136627

139. Goguillot M, Claverie-Chau I, Bénard S, et al. Patient characteristics and in-hospital management of episodes of acquired thrombotic thrombocytopenic purpura: a French real-life population based study [abstract PSY10]. *Value Health.* 2018;21(Suppl 3):S437. doi:10.1016/j.jval.2018.09.2587

140. Graciaa S, Adeagbo S, McElfresh P, Briones M, Chonat S. Long term neurological outcomes in pediatric thrombotic thrombocytopenic purpura. *Pediatric Blood & Cancer* 2020;67(S4):S14–S15.

141. Güzel Mastanzade M, Kalayoğlu Beşışık S, Dadın SA, et al. The efficacy of reuse therapeutic plasma exchange in relapsed/refractory immune-mediated thrombotic thrombocytopenic purpura: a single-center experience of 130 cases [abstract PP-35]. *Leuk Res.* 2019;85(Suppl 1):S52-S53. doi:10.1016/s0145-2126(19)30330-3

142. Han B, Page EE, Stewart LM, et al. Depression and cognitive impairment following recovery from thrombotic thrombocytopenic purpura. *Am J Hematol.* 2015;90(8):709–714. doi:10.1002/ajh.24060

143. Hie M, Gay J, Galicier L, et al. Preemptive rituximab infusions efficiently prevent relapses in acquired thrombotic thrombocytopenic purpura. Experience of the French Thrombotic Microangiopathies Reference Center. *Blood.* 2013;122(21):448. doi:10.1182/blood.V122.21.448.448

144. Hofmann JC. Assessing the efficacy of pretreatment plasma infusion in selected patients with acquired TTP. *J Clin Apher.* 2019;34(Suppl 2):127. doi:10.1002/jca.21704

145. Holmes S, Podger L, Bottomley C, Rzepa E, Bailey KMA, Chandler F. Survival after acute episodes of immune-mediated thrombotic thrombocytopenic purpura (iTTP) - cognitive functioning and health-related quality of life impact: a descriptive cross-sectional survey of adults living with iTTP in the United Kingdom. *Hematology.* 2021;26(1):S465–S472. doi:10.1080/16078454.2021.1945236

146. Hong J, Byun JM, Lee YJ, et al. A survey on the use of rituximab in Korean patients with acquired thrombotic thrombocytopenic purpura. *Res Pract Thromb Haemost.* 2019;3(Suppl 1):751. doi:10.1002/rth2.12229

147. Hrachovinova I, Loužil J, Pohlreichova V, Geierova V, Salaj P. Severe ADAMTS-13 deficiency during follow up in remission ITTP [abstract PB1613]. *Res Pract Thromb Haemost.* 2019;3(Suppl 1):755. doi:10.1002/rth2.12229

148. Hsu YS, Dynis M, Grossman BJ. Seasonal occurrence and associating infections of severe ADAMTS13 deficient thrombotic thrombocytopenia purpura. *Transfusion.* 2011;51:12A. doi:10.1111/j.1537-2995.2011.03301_1.x

149. Huang F, Li XP, Xu Y, et al. Clinical characteristics and outcomes of adult patients with acquired thrombotic thrombocytopenic purpura: a single center retrospective study. *Ann Palliat Med.* 2021;10(5):5351–5358. doi:10.21037/apm-21-759

150. Jestin M, Benhamou Y, Schelpe AS, et al. Preemptive rituximab prevents long-term relapses in immune-mediated thrombotic thrombocytopenic purpura. *Blood.* 2018;132(20):2143–2153. doi:10.1182/blood-2018-04-840090

151. Jimenez MM, Bobillo S, Pérez A, et al. Real-world data with the use of caplacizumab in the treatment of acquired thrombotic thrombocytopenic purpura (aTTP). *Blood.* 2020;136(Suppl 1):14–16. doi:10.1182/blood-2020-142987

152. Joly BS, Stepanian A, Leblanc T, et al. Child-onset and adolescent-onset acquired thrombotic thrombocytopenic purpura with severe ADAMTS13 deficiency: a cohort study of the French national registry for thrombotic microangiopathy. *Lancet Haematol.* 2016;3(11):e537-e546. doi:10.1016/s2352-3026(16)30125-9

153. Kayashima M, Sakai K, Harada K, et al. Strong association between insufficient plasma exchange and fatal outcomes in Japanese patients with immune-mediated thrombotic thrombocytopenic purpura. *Int J Hematol.* 2021;114(4):415–423. doi:10.1007/s12185-021-03197-5

154. Kubo M, Sakai K, Yoshii Y, Hayakawa M, Matsumoto M. Rituximab prolongs the time to relapse in patients with immune thrombotic thrombocytopenic purpura: analysis of off-label use in Japan. *Int J Hematol.* 2020;112(6):764–772. doi:10.1007/s12185-020-02974-y

155. Li XM, Mo XY, Huang GQ, Zhang FJ. Therapeutical plasma exchange for thrombotic thrombocytopenic purpura in the emergency department: A single center experience. *Am J Emerg Med.* 2021;46:556–559. doi:10.1016/j.ajem.2020.11.019

156. Little DJ, Mathias LM, Page EE, Kremer Hovinga JA, Vesely SK, George JN. Long-term kidney outcomes in patients with acquired thrombotic thrombocytopenic purpura. *Kidney Int Rep.* 2017;2(6):1088–1095. doi:10.1016/j.ekir.2017.06.007

157. Liu A, Mazepa M, Davis E, et al. African American race is associated with decreased relapse-free survival in immune thrombotic thrombocytopenic purpura. *Blood.* 2019;134:1066. doi:10.1182/blood-2019-131064

158. Logothetis CN, Patel A, Eatrides J, et al. Post approval experience with caplacizumab for acquired thrombotic thrombocytopenic purpura at a single institution. *J Clin Med.* 2021;10(15):3418. doi:10.3390/jcm10153418

159. Mancini I, Pontiggia S, Palla R, et al. Clinical and laboratory features of patients with acquired thrombotic thrombocytopenic purpura: fourteen years of the Milan TTP registry. *Thromb Haemost.* 2019;119(5):695–704. doi:10.1055/s-0039-1679907

160. Mancini I, Giacomini E, Pontiggia S, et al. The HLA variant rs6903608 is associated with disease onset and relapse of immune-mediated thrombotic thrombocytopenic purpura in Caucasians. *J Clin Med.* 2020;9(10):3379. doi:10.3390/jcm9103379

161. Marshall MA, Evans M, Davis E, et al. Differential effect of rituximab on relapse-free survival in de novo and relapsed immune thrombotic thrombocytopenic purpura in African-American and Caucasian populations. *Blood.* 2019;134(1). doi:10.1182/blood-2019-129383

162. Masias C, Yang S, Sukumar S, et al. Relapse prediction model for immune-mediated thrombotic thrombocytopenic purpura. *Blood.* 2020;136:8–9. doi:10.1182/blood-2020-142117

163. Matsumoto M, Bennett CL, Isonishi A, et al. Acquired idiopathic ADAMTS13 activity deficient thrombotic thrombocytopenic purpura in a population from Japan. *PLoS One.* 2012;7(3):e33029.

164. Miesbach W, Menne J, Bommer M, et al. Incidence of acquired thrombotic thrombocytopenic purpura in Germany: a hospital level study. *Orphanet J Rare Dis.* 2019;14(1):260. doi:10.1186/s13023-019-1240-0

165. Morgand M, Buffet M, Busson M, et al. High prevalence of infectious events in thrombotic thrombocytopenic purpura and genetic relationship with toll-like receptor 9 polymorphisms: experience of the French Thrombotic Microangiopathies Reference Center. *Transfusion.* 2014;54(2):389–397. doi:10.1111/trf.12263

166. Owattanapanich W, Wongprasert C, Rotchanapanya W, Owattanapanich N, Ruchutrakool T. Comparison of the long-term remission of rituximab and conventional treatment for acquired thrombotic thrombocytopenic purpura: a systematic review and meta-analysis. *Clin Appl Thromb Hemost.* 2019;25. doi:10.1177/1076029618825309

167. Page EE, Kremer Hovinga JA, Terrell DR, Vesely SK, George JN. Thrombotic thrombocytopenic purpura: diagnostic criteria, clinical features, and long-term outcomes from 1995 through 2015. *Blood Adv.* 2017;1(10):590–600. doi:10.1182/bloodadvances.2017005124

168. Pascual-Izquierdo MC, Del Rio-Garma J, De La Rubia J, et al. Incidence, diagnosis, and outcome of acquired thrombotic thrombocytopenic purpura (attp): s nationwide survey by the Spanish Apheresis Group. *Blood.* 2019;134(Suppl 1):4910. doi:10.1182/blood-2019-123258

169. Pascual-Izquierdo C, del Rio-Garma J, de la Rubia J, et al. Incidence, diagnosis, and outcome of immune-mediated thrombotic thrombocytopenic purpura: a nationwide survey by the Spanish registry of thrombotic thrombocytopenic purpura. *J Clin Apher.* 2021;36(4):563–573. doi:10.1002/jca.21894

170. Pham HP, Cao W, Williams LA, et al. Predictors for 30-day mortality in patients with acquired autoimmune Thrombotic thrombocytopenia purpura (TTP): a single center experience. *Transfusion.* 2016;56(Suppl 4):80A. doi:10.1111/trf.13807

171. Pollissard L, Shah A, Punekar RS, Petrilla A, Pham HP. Burden of illness among Medicare and non-Medicare US populations with acquired thrombotic thrombocytopenic purpura. *J Med Econ.* 2021;24(1):706–716. doi:10.1080/13696998.2021.1922262

172. Ramachandran P, Erdinc B, Abowali HA, Narayanan S, Wang JC. Overview of clinical characteristics of patients with TTP (thrombotic thrombocytopenic purpura) in a low socioeconomic population in New York: a 6-year center experience [abstract BSH2020-EP-170]. *Br J Haematol.* 2020;189(Suppl 1):276. doi:10.1111/bjh.16638

173. Raval JS, Mazepa MA, Rollins-Raval MA, Kasthuri RS, Park YA. Therapeutic plasma exchange taper does not decrease exacerbations in immune thrombotic thrombocytopenic purpura patients. *Transfusion.* 2020;60(8):1676–1680. doi:10.1111/trf.15901

174. Renaud A, Caristan A, Seguin A, et al. Deleterious neurological impact of diagnostic delay in immune-mediated thrombotic thrombocytopenic purpura. *PLoS One.* 2021;16(11):e0260196. doi:10.1371/journal.pone.0260196

175. Riva S, Mancini I, Maino A, et al. Long-term neuropsychological sequelae, emotional wellbeing and quality of life in patients with acquired thrombotic thrombocytopenic purpura. *Haematologica.* 2020;105(7):1957–1962. doi:10.3324/haematol.2019.226423

176. Salaj P, Louzil J, Pohlreichova V, Geierova V, Capova I, Hrachovinova I. Acquired TTP in Prague: more than 20 years single centre experience [abstract PB 706]. *Res Pract Thromb Haemost.* 2017;1(S1):1299. doi:10.1002/rth2.12012

177. Schieppati F, Russo L, Marchetti M, et al. Combined elevated anti-Adamts-13 antibody level and low Adamts-13 Activity during remission highly predicts disease relapse in a prospective cohort of patients with autoimmune thrombotic thrombocytopenic purpura (TTP). *Blood.* 2018;132(Suppl 1):2443. doi:0.1182/blood-2018-99-119317

178. Schieppati F, Russo L, Marchetti M, et al. Low levels of ADAMTS-13 with high anti-ADAMTS-13 antibodies during remission of immune-mediated thrombotic thrombocytopenic purpura highly predict for disease relapse: a multi-institutional study. *Am J Hematol.* 2020;95(8):953–959. doi:10.1002/ajh.25845

179. Schneidewend R, Narendranath E, Friedman KD. Chapter 134 - Thrombotic thrombocytopenic purpura and the hemolytic uremic syndromes. In Hoffman R, Benz EJ, Silberstein LE, et al., eds. *Hematology: Basic Principles and Practice*. 7th ed. Philadelphia, PA: Elsevier; 2018:1984–2000.

180. Sinkovits G, Szilágyi Á, Farkas P, et al. Concentration and subclass distribution of anti-ADAMTS13 IgG autoantibodies in different stages of acquired idiopathic thrombotic thrombocytopenic purpura. *Front Immunol.* 2018;9:1646. doi:10.3389/fimmu.2018.01646

181. Sridharan M, Antun AG, Kreuziger LB, et al. The impact of detectable ADAMTS-13 inhibitor on the clinical presentation and outcome of patients with immune thrombotic thrombocytopenic purpura (ITTP): analysis using the United States thrombotic microangiopathy (USTMA) clinical registry *Blood.* 2017;130(1):3620. doi:10.1182/blood.V130.Suppl_1.3620.3620

182. Staley EM, Cao W, Pham HP, et al. Clinical factors and biomarkers predict outcome in patients with immune-mediated thrombotic thrombocytopenic purpura. *Haematologica.* 2019;104(1):166. doi:10.3324/haematol.2018.198275

183. Sukumar S, Brodsky M, Hussain S, et al. Cardiovascular disease is a leading cause of mortality among TTP survivors in clinical remission. *Blood Adv.* 2022;6(4):1264–1270.

184. Sun L, Mack J, Li A, et al. Predictors of relapse and efficacy of rituximab in immune thrombotic thrombocytopenic purpura. *Blood Adv.* 2019;.3(9):1512–1518. doi:10.1182/bloodadvances.2019031039

185. Sun RX, Xu J, Zhu HD, Yu XZ, Yang J. Clinical presentation and management of acquired thrombotic thrombocytopenic purpura: a case series of 55 patients. *Ther Apher Dial.* 2021;25(1):118–123. doi:10.1111/1744-9987.13502

186. Tekgündüz E, Yılmaz M, Erkurt MA, et al. A multicenter experience of thrombotic microangiopathies in Turkey: the Turkish Hematology Research and Education Group (ThREG)-TMA01 study. *Transfus Apher Sci.* 2018;57(1):27–30. doi:10.1016/j.transci.2018.02.012

187. Terrell D, Neighbors K, Llaneza AJ, et al. Creating clinical meaning for the promis cognitive function abilities instrument: Improving remission outcomes for adults with thrombotic thrombocytopenic purpura. *Blood.* 2021;138(Suppl 1):834. doi:10.1182/blood-2021-153720

188. Tiscia GL, Cappucci F, Fischetti L, et al. Presentation, diagnosis, treatment, and outcome in acquired thrombotic thrombocytopenic purpura: An investigation of patients from South Italy [abstract PO088]. *Blood Transfus.* 2020;18(Suppl 4):S526. doi:10.2450/2020.S4

189. Tiscia G, Sartori MT, Giuffrida G, et al. Focus on key issues in immune thrombotic thrombocytopenic purpura: Italian experience of six centers. *J Clin Med.* 2021;10(23):5702. doi:10.3390/jcm10235702

190. Toussaint-Hacquard M, Coppo P, Soudant M, et al. Type of plasma preparation used for plasma exchange and clinical outcome of adult patients with acquired idiopathic thrombotic thrombocytopenic purpura: a French retrospective multicenter cohort study. *Transfusion.* 2015;55(10):2445–2451. doi:10.1111/trf.13229

191. Upreti H, Kasmani J, Dane K, et al. Reduced ADAMTS13 activity during TTP remission is associated with stroke in TTP survivors. *Blood.* 2019;134(13):1037–1045. doi:10.1182/blood.2019001056

192. Vataire A, Nevoret C, Bouée S, Duvivier A, Coppo P. Effectiveness of caplacizumab on reducing acute mortality in acquired thrombotic thrombocytopenic purpura: Results from a French national registry (CNR-MAT) [abstract POSB4]. *Value Health.* 2022;25(Suppl)(1):S25. doi:10.1016/j.jval.2021.11.114

193. Vataire AL, Duvivier A, Karam P, Coppo P. Comparison of healthcare resource utilization among hospitalized patients with acquired thrombotic thrombocytopenic purpura treated with or without caplacizumab: a French hospital database (PMSI) Analysis [abstract POSA5]. *Value Health.* 2022;25(Suppl)(1):S18. doi:10.1016/j.jval.2021.11.080

194. von Auer C, Schmidtmann I, Bach L, et al. Eleven relapses in a cohort of 78 patients with immune thrombotic thrombocytopenic purpura (iTTP): data from the German TTP-registry. *Hämostaseologie.* 2019;39(Suppl S 01):SY06-05-AB. doi:10.1055/s-0039-1680106

195. von Auer-Wegener C, Falter T, Messmer X, et al. Prospective observational registry for acquired autoimmune thrombotic thrombocytopenic purpura (iTTP) of the University Medical Center Mainz [abstract LB 10]. *Res Pract Thromb Haemost.* 2017;1(Suppl 2):11. doi:10.1002/rth2.12026

196. von Auer-Wegener C, Schmidtmann I, Bach L, et al. Longitudinal assessment of ADAMTS13-activity helps predict recurrence of immune thrombotic thrombocytopenic purpura (iTTP): results from the German TTP-registry [abstract OC 07.4]. *Res Pract Thromb Haemost.* 2020;4(Suppl 1):21.

197. Vuclić D, Rajić Z, Savić N, et al. Clinical experience in treatment of thrombotic thrombocytopenic purpura-hemolytic uremic syndrome with 28 patients. *Acta Chir Iugosl.* 2013;60(1):29–38. doi:10.2298/aci1301029v

198. Wai SH, Ng HJ, Wen TC, Quek J, Mya HT. Comparison of treatment and outcomes between acquired primary and secondary thrombotic thrombocytopenic purpura. *Haematologica.* 2017;102(2):580.

199. Wu N, Liu J, Yang S, et al. Diagnostic and prognostic values of ADAMTS13 activity measured during daily plasma exchange therapy in patients with acquired thrombotic thrombocytopenic purpura. *Transfusion.* 2015;55(1):18–24. doi:10.1111/trf.12762

200. Yamada Y, Ohbe H, Yasunaga H, Miyakawa Y. Clinical practice pattern of acquired thrombotic thrombocytopenic purpura in Japan: a nationwide inpatient database analysis. *Blood.* 2019;134(Suppl 1):2374. doi:10.1182/blood-2019-125170

201. Zhou X, Ye X, Ren Y, et al. Diagnosis and management of acquired thrombotic thrombocytopenic purpura in southeast China: a single center experience of 60 cases. *Front Med.* 2016;10(4):430–436. doi:10.1007/s11684-016-0492-5

202. Alwan F, Vendramin C, Liesner R, et al. Characterizing the United Kingdom congenital thrombotic thrombocytopenic purpura population. *Blood.* 2017;130(Suppl 1):3616. doi:10.1182/blood.V130.Suppl_1.3616.3616

203. Alwan F, Vendramin C, Liesner R, et al. Characterization and treatment of congenital thrombotic thrombocytopenic purpura. *Blood.* 2019;133(15):1644–1651. doi:10.1182/blood-2018-11-884700

204. Borogovac A, Reese JA, Gupta S, George JN. Morbidities and mortality in patients with hereditary thrombotic thrombocytopenic purpura. *Blood Adv.* 2022;6(3):750–759. doi:10.1182/bloodadvances.2021005760

205. Hassenpflug WA, Budde U, Schneppenheim S, Schneppenheim R. Inherited thrombotic thrombocytopenic purpura in children. *Semin Thromb Hemost.* 2014;40(4):487–492. doi:10.1055/s-0034-1376152

206. Joly BS, Boisseau P, Roose E, et al. ADAMTS13 gene mutations influence ADAMTS13 conformation and disease age-onset in the French cohort of Upshaw-Schulman syndrome. *Thromb Haemost.* 2018;118(11):1902–1917. doi:10.1055/s-0038-1673686

207. Kremer Hovinga J, Cermakova Z, Fujimura Y, et al. Hereditary thrombotic thrombocytopenic purpura-incidence of acute events under plasma prophylaxis [abstract OC 63.2]. *Res Pract Thromb Haemost* 2017;1(Suppl 1):262. doi:10.1002/rth2.12012

208. Mansouri M, Matsumoto M, Cermakova Z, et al. Hereditary TTP-a young patient population with high prevalence of arterial thromboembolic events: first results from the hereditary TTP registry [abstract OR152]. *J Thromb Haemost.* 2015;13(Suppl 2):153. doi:10.1111/jth.12993

209. Oladapo AO, Ito D, Hibbard C, Bean SE, Krupnick RN, Ewenstein BM. Patient experience with congenital (hereditary) thrombotic thrombocytopenic purpura: a conceptual framework of symptoms and impacts. *Patient.* 2019;12(5):503–512. doi:10.1007/s40271-019-00365-y

210. Rurali E, Banterla F, Donadelli R, et al. ADAMTS13 secretion and residual activity among patients with congenital thrombotic thrombocytopenic purpura with and without renal impairment. *Clin J Am Soc Nephrol.* 2015;10(11):2002–2012.

211. Sakai K, Fujimura Y, Miyata T, Isonishi A, Kokame K, Matsumoto M. Current prophylactic plasma infusion protocols do not adequately prevent long-term cumulative organ damage in the Japanese congenital thrombotic thrombocytopenic purpura cohort. *Br J Haematol.* 2021;194(2):444–452. doi:10.1111/bjh.17560

212. Tarasco E, Bütikofer L, Friedman KD, et al. Annual incidence and severity of acute episodes in hereditary thrombotic thrombocytopenic purpura. *Blood.* 2021;137(25):3563–3575. doi:10.1182/blood.2020009801

213. Tarasco E., Hengartner H, Wyatt K, et al. Pediatric patients with hereditary thrombotic thrombocytopenic purpura (hTTP): opportunities and challenges in disease management, data from the international hTTP Registry (hTTPR) [abstract O13]. *Swiss Medical Weekly.* 2021;151(255):8S. doi:10.4414/SMW.2021.w30107

214. van Dorland HA, Taleghani MM, Sakai K, et al. The International Hereditary Thrombotic Thrombocytopenic Purpura Registry: key findings at enrollment until 2017. *Haematologica.* 2019;104(10):2107–2115. doi:10.3324/haematol.2019.216796

215. von Krogh A-S, Waage A, Strebel JAKH, Quist-Paulsen P. Unexpected high frequency of Upshaw-Schulman Syndrome in Norway. *Blood.* 2012;120(21):3315. doi:10.1182/blood.V120.21.3315.3315

216. von Krogh AS, Quist-Paulsen P, Waage A, et al. High prevalence of hereditary thrombotic thrombocytopenic purpura in central Norway: from clinical observation to evidence. *J Thromb Haemost.* 2016;14(1):73–82. doi:10.1111/jth.13186

217. Alwan F, Mahdi D, Tayabali S, et al. Cerebral MRI findings predict the risk of cognitive impairment in thrombotic thrombocytopenic purpura. *Br J Haematol.* 2020;191(5):868–874. doi:10.1111/bjh.17126

218. Fujimura Y, Matsumoto M. Registry of 919 patients with thrombotic microangiopathies across Japan: database of Nara Medical University during 1998-2008. *Intern Med J.* 2010;49(1):7–15. doi:10.2169/internalmedicine.49.2706

219. Joly B, Boisseau P, Stepanian A, et al. Child-onset thrombotic thrombocytopenic purpura: the French Reference Center for Thrombotic Microangiopathies experience. *Blood Transfus.* 2017;15 (Suppl. 3):s512.

220. Keren-Politansky A, Tennenbaum G, Brenner B, Sarig G. The incidence of thrombotic thrombocytopenic purpura in Israel, as determined by ADAMTS-13 activity and anti-ADAMTS-13 antibody levels [abstract PB 699]. *Res Pract Thromb Haemost.* 2017;2017(Suppl 1):1296. doi:10.1002/rth2.12012

221. Satija A, Tzivelekis S, Swallow E, et al. The clinical burden of congenital and immunemediated thrombotic thrombocytopenic purpura: a retrospective cohort analysis [abstract PB0843]. *Res Pract Thromb Haemost.* 2021;5(Suppl 2):625. doi:10.1002/rth2.12589
